# Supplementary material for: TET1 upregulation drives cancer cell growth through aberrant enhancer hydroxymethylation of HMGA2 in hepatocellular carcinoma
Source: PubMed Central journal article supplement — Cancer Sci. 2021 May 10;112(7):2855–69. doi: 10.1111/cas.14897 (PMC8253281; doi:10.1111/cas.14897), 2021-05-10
Supplement: CAS-112-2855-s001.pdf [file CAS-112-2855-s001.pdf]

# Figure S1

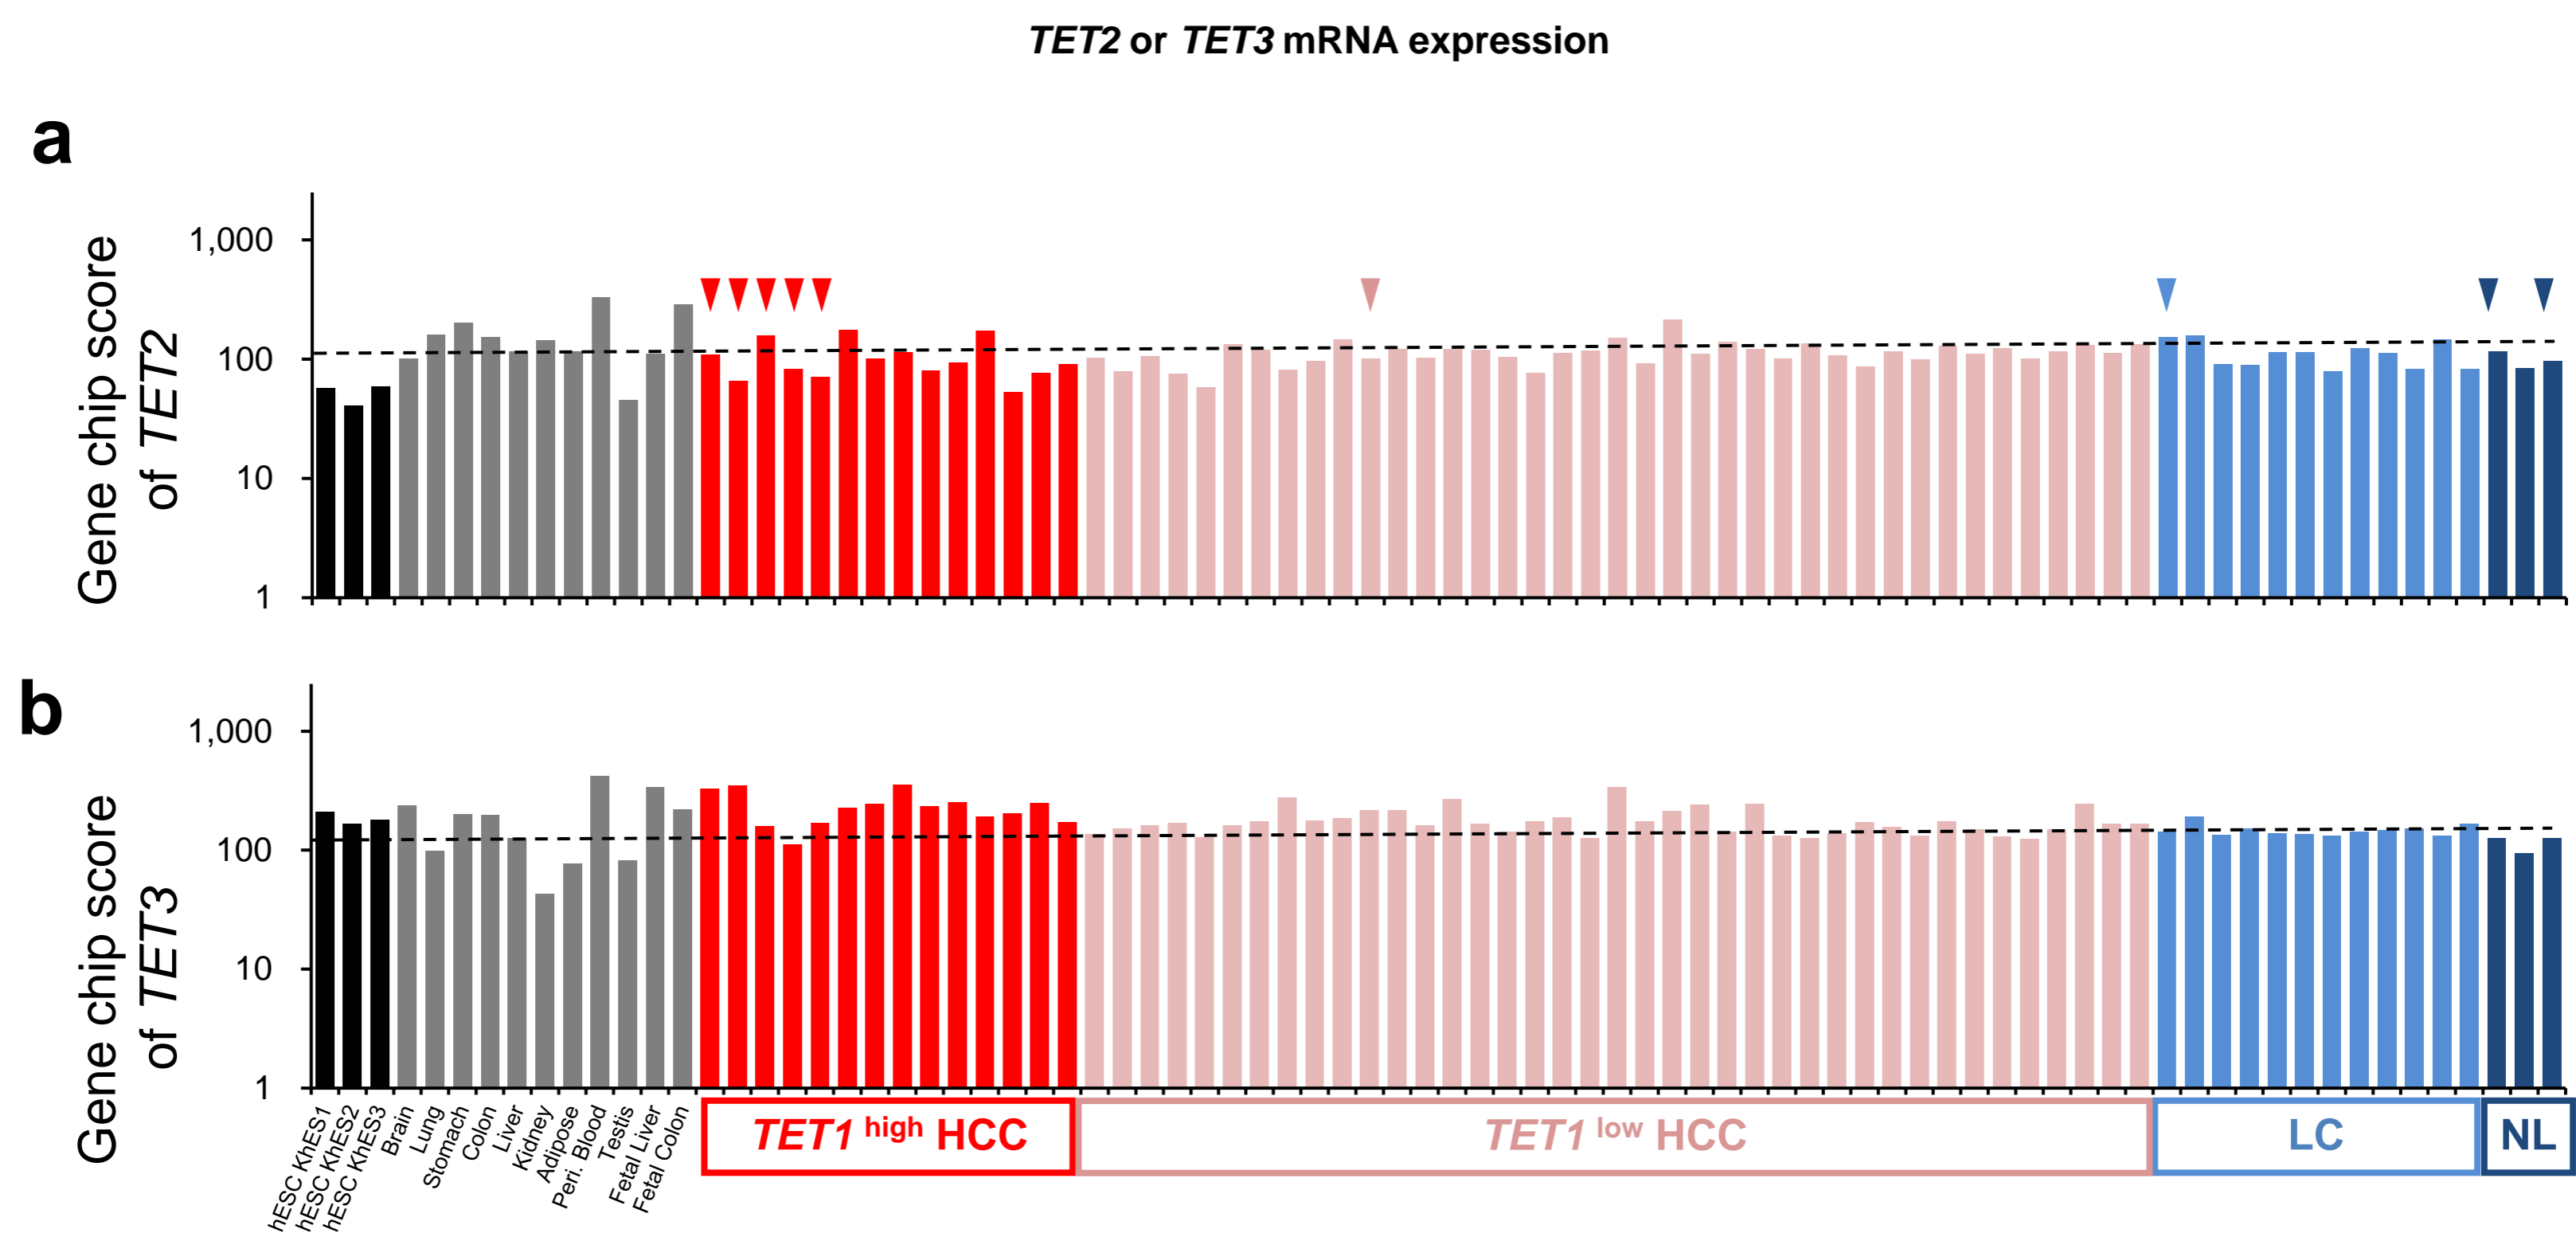

## Figure S1 | mRNA expression level of *TET2* and *TET3*.

*TET2* (a) and *TET3* (b) expression level among hESCs, somatic tissues and HCCs in expression microarray (U133 plus 2.0, Affymetrix). *TET2*, Gene Name- KIAA1546, Probe Name: 227624at. Lower: *TET3*, Gene Name: hCG\_40378, Probe Name: 235542at. hESC, human embryonic stem cell ; HCC, hepatocellular carcinoma; LC, liver cirrhosis (corresponding non-cancerous liver); NL, normal liver.

# Figure S2

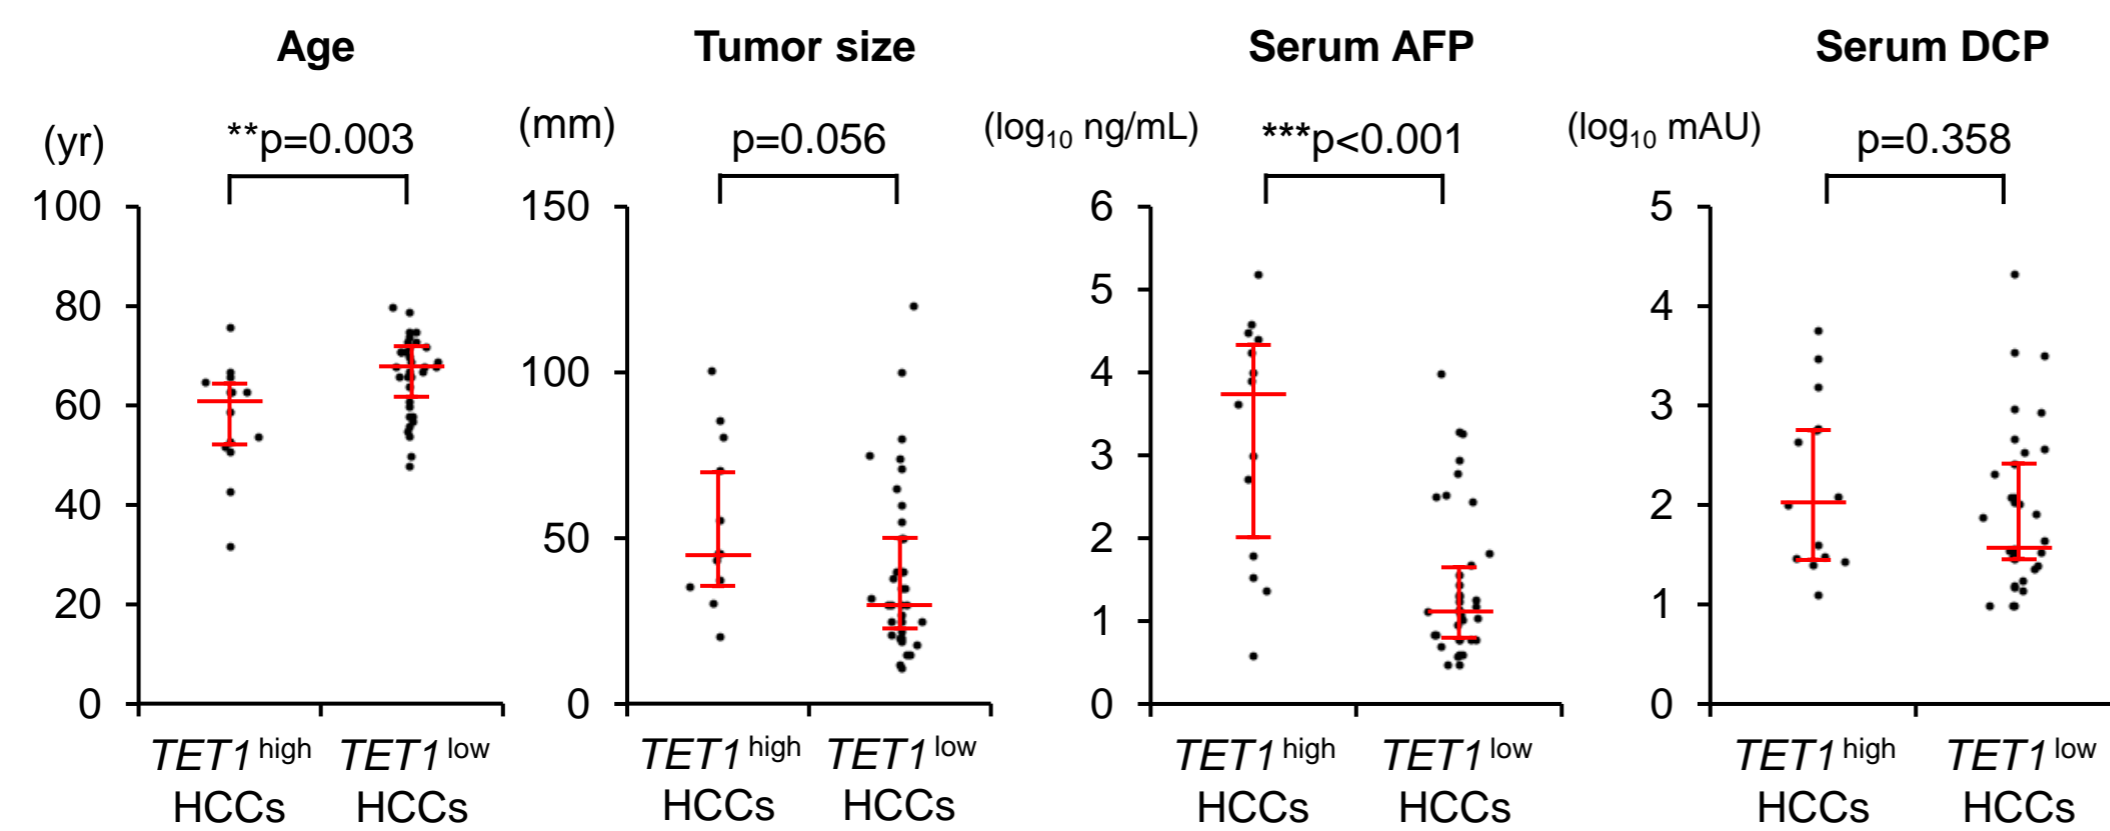

**Figure S2 | Clinicopathological characteristics of HCC patients associated with *TET1* expression.**

Clinical characteristics of HCCs. AFP,  $\alpha$ -fetoprotein; DCP, des-gamma-carboxy prothrombin; Data are shown as median  $\pm$  quartile. p values are measured by Mann–Whitney U test. \*\*p < 0.01; \*\*\*p < 0.001.

# Figure S3

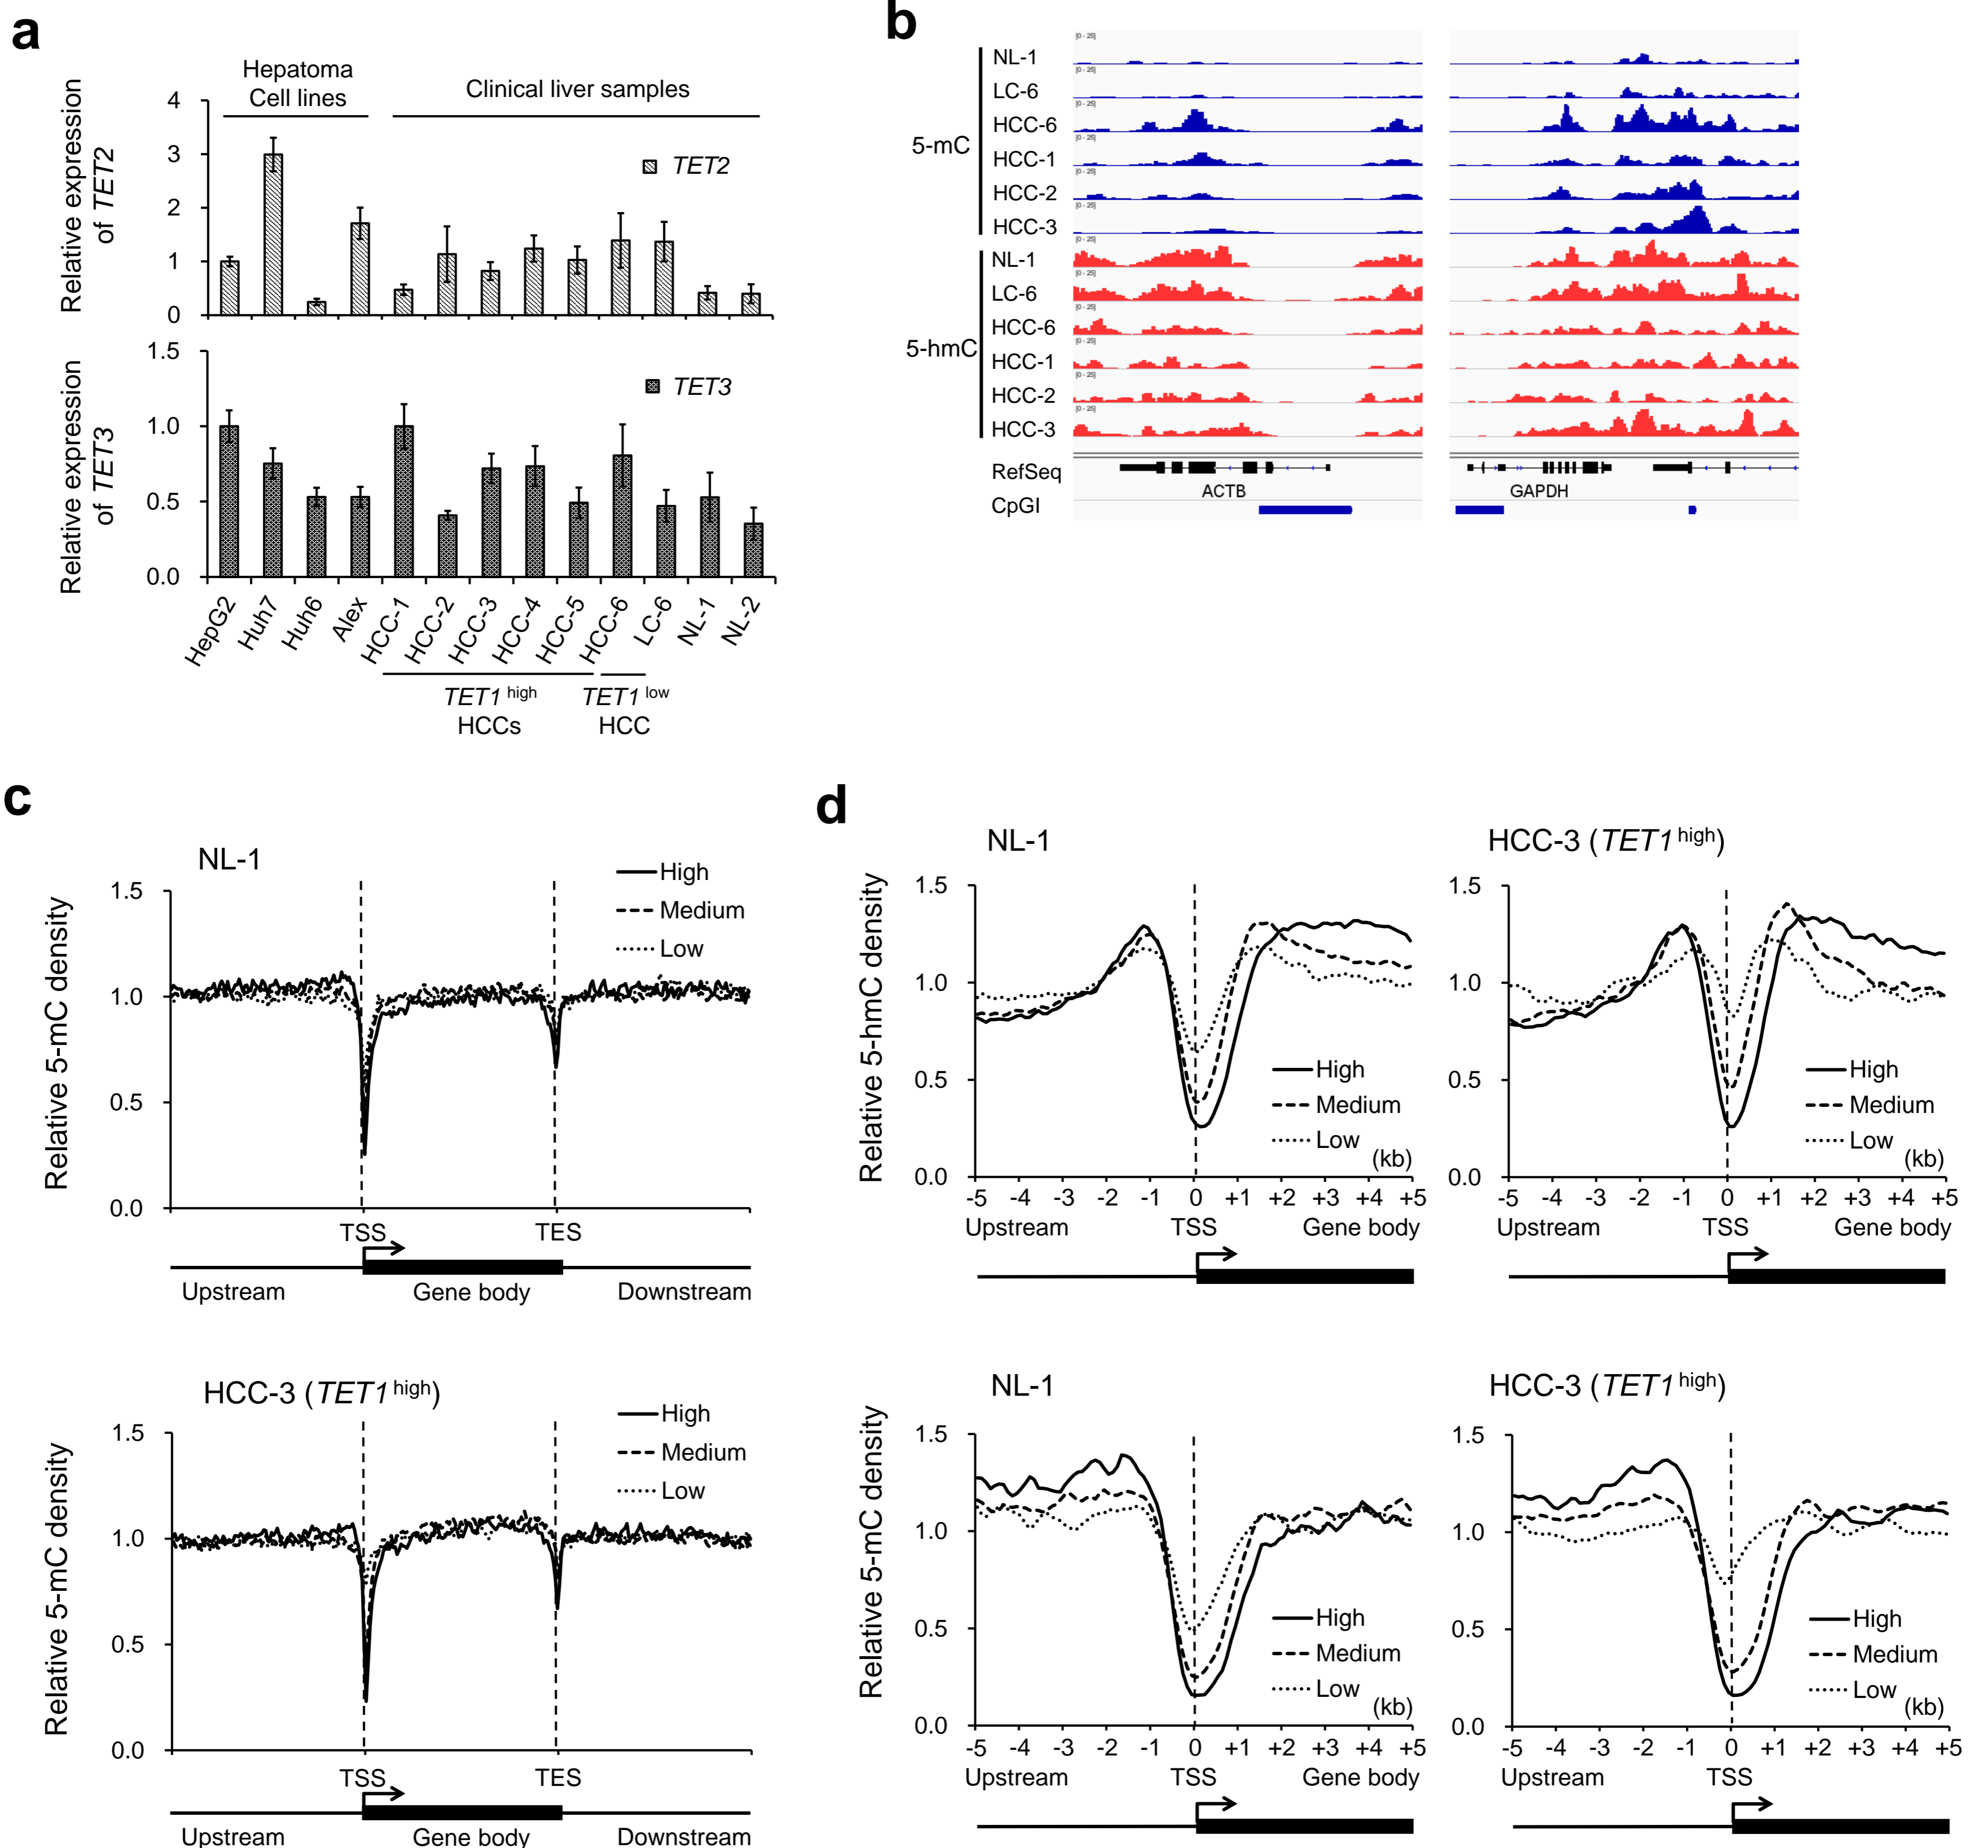

## Figure S3 | 5mC and 5hmC profiles of clinical liver tissues.

(a) Relative *TET2* (upper) and *TET3* (lower) mRNA expression of hepatoma cells and clinical liver samples by RT-qPCR. *TET1*<sup>high</sup> HCCs, HCCs of high level *TET1* (GeneChip score > 50); *TET1*<sup>low</sup> HCC, HCC of low level *TET1* (GeneChip score < 50). Data are shown as mean ± SD from triplicate experiments. (b) Genome-wide profiling of 5mC (upper) and 5hmC (lower) for clinical liver tissues in *ACTB* and *GAPDH* locus. (c) 5mC distributions relative to human RefSeq gene position by MeDIP-seq at different expression levels in clinical liver samples. (d) 5hmC and 5mC distributions relative to each gene position around TSS (±5kb) by hmeDIP-seq (upper) and MeDIP-seq (lower) for clinical liver samples according to their gene expression levels. Expression level, High; GeneChip score > 250, Low; GeneChip score < 25, Medium; GeneChip score 25-250

# Figure S4

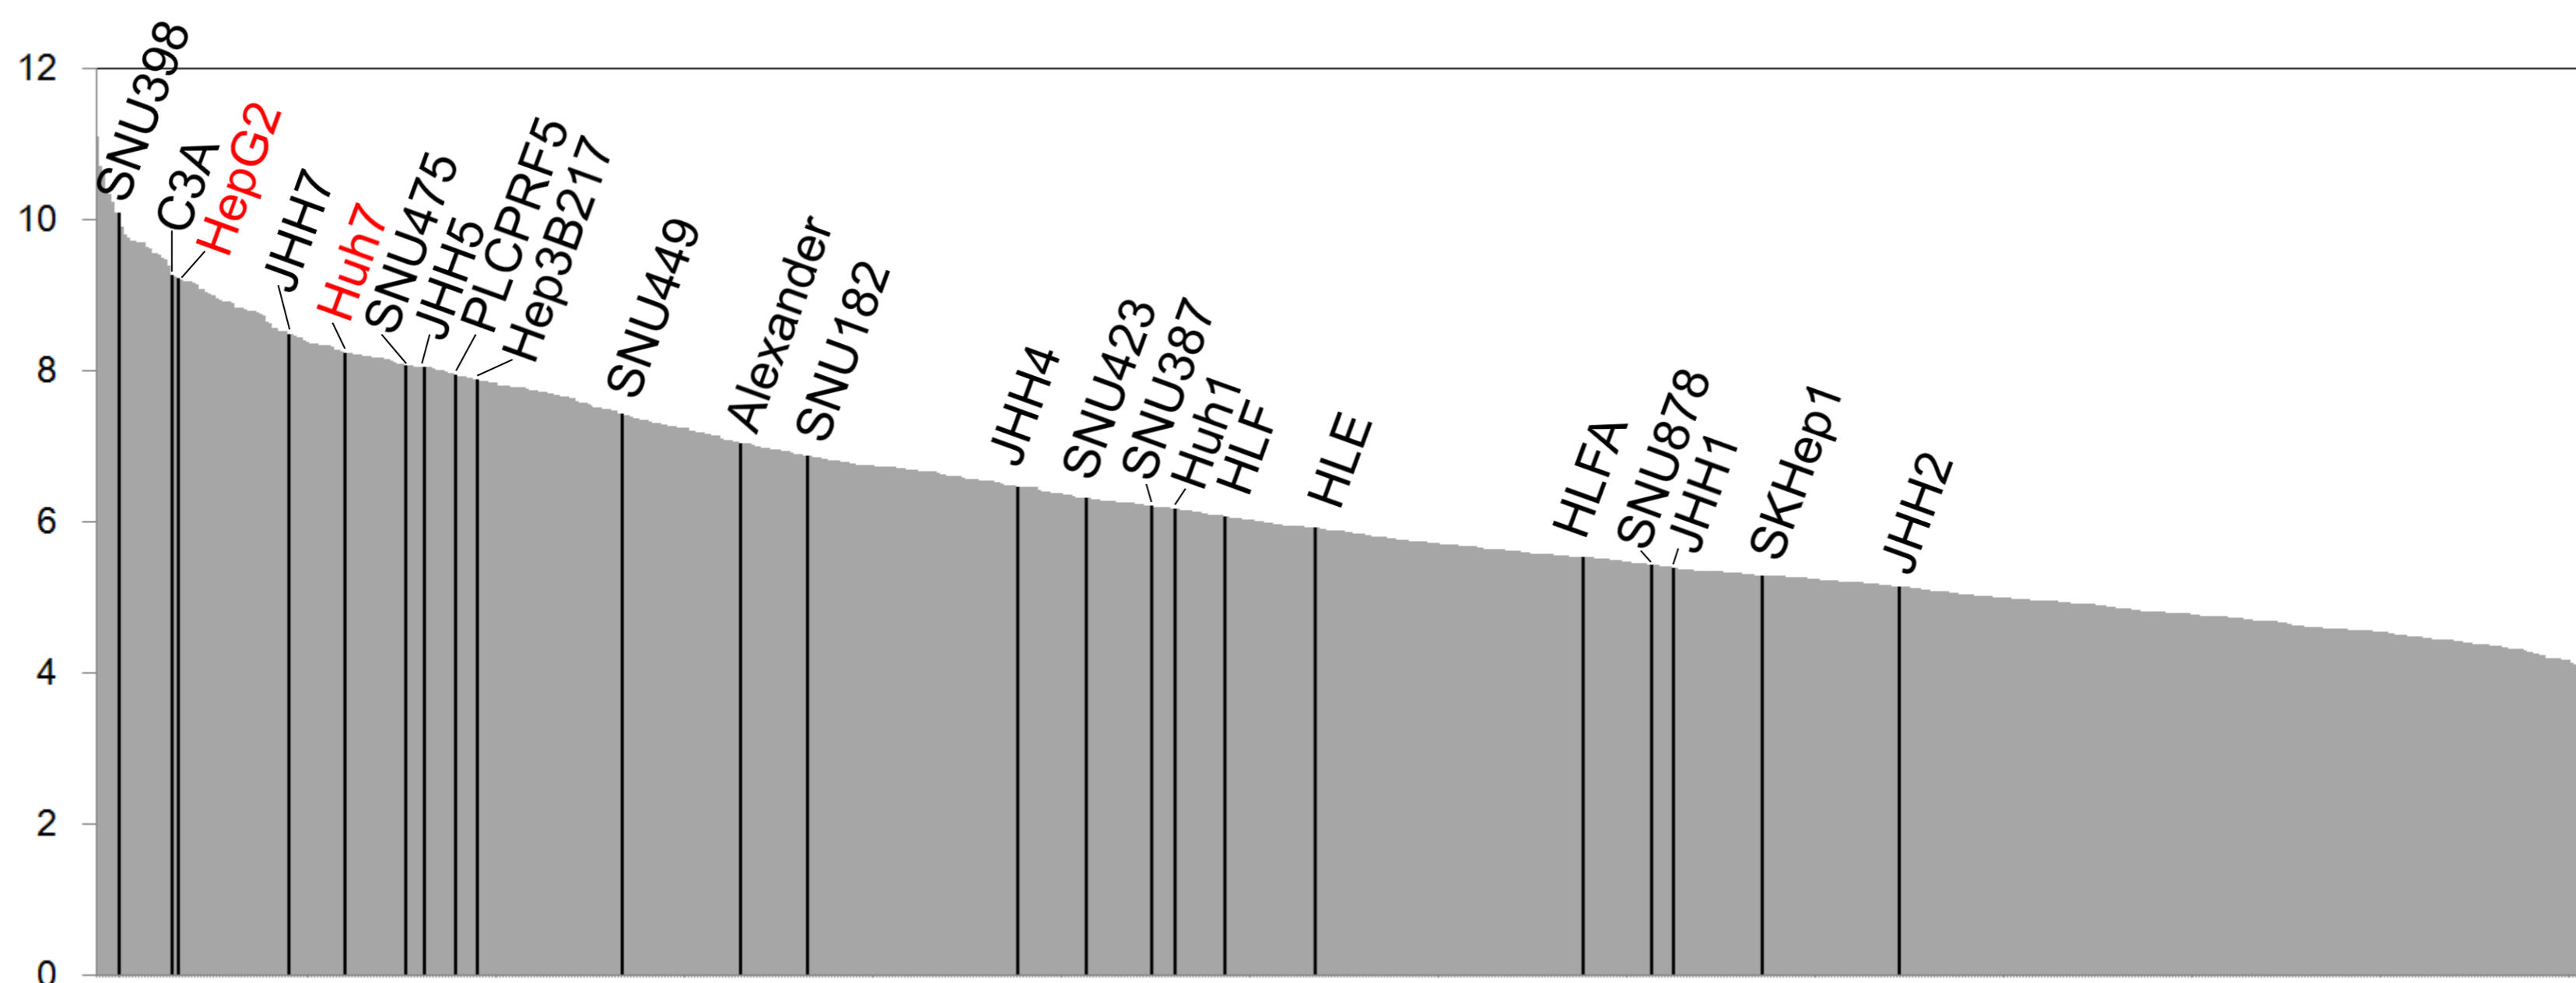

## Figure S4 | Expression level of TET1 in 807 CCLE cancer cell lines.

The 807 CCLE cancer cell lines are arranged in order of *TET1* expression level and shown in a gray bar graph.

The 23 liver cancer cell lines are shown in black, and their names are appended above.

CCLE: Broad Institute Cancer Cell Line Encyclopedia, <https://portals.broadinstitute.org/ccle>

# Figure S5

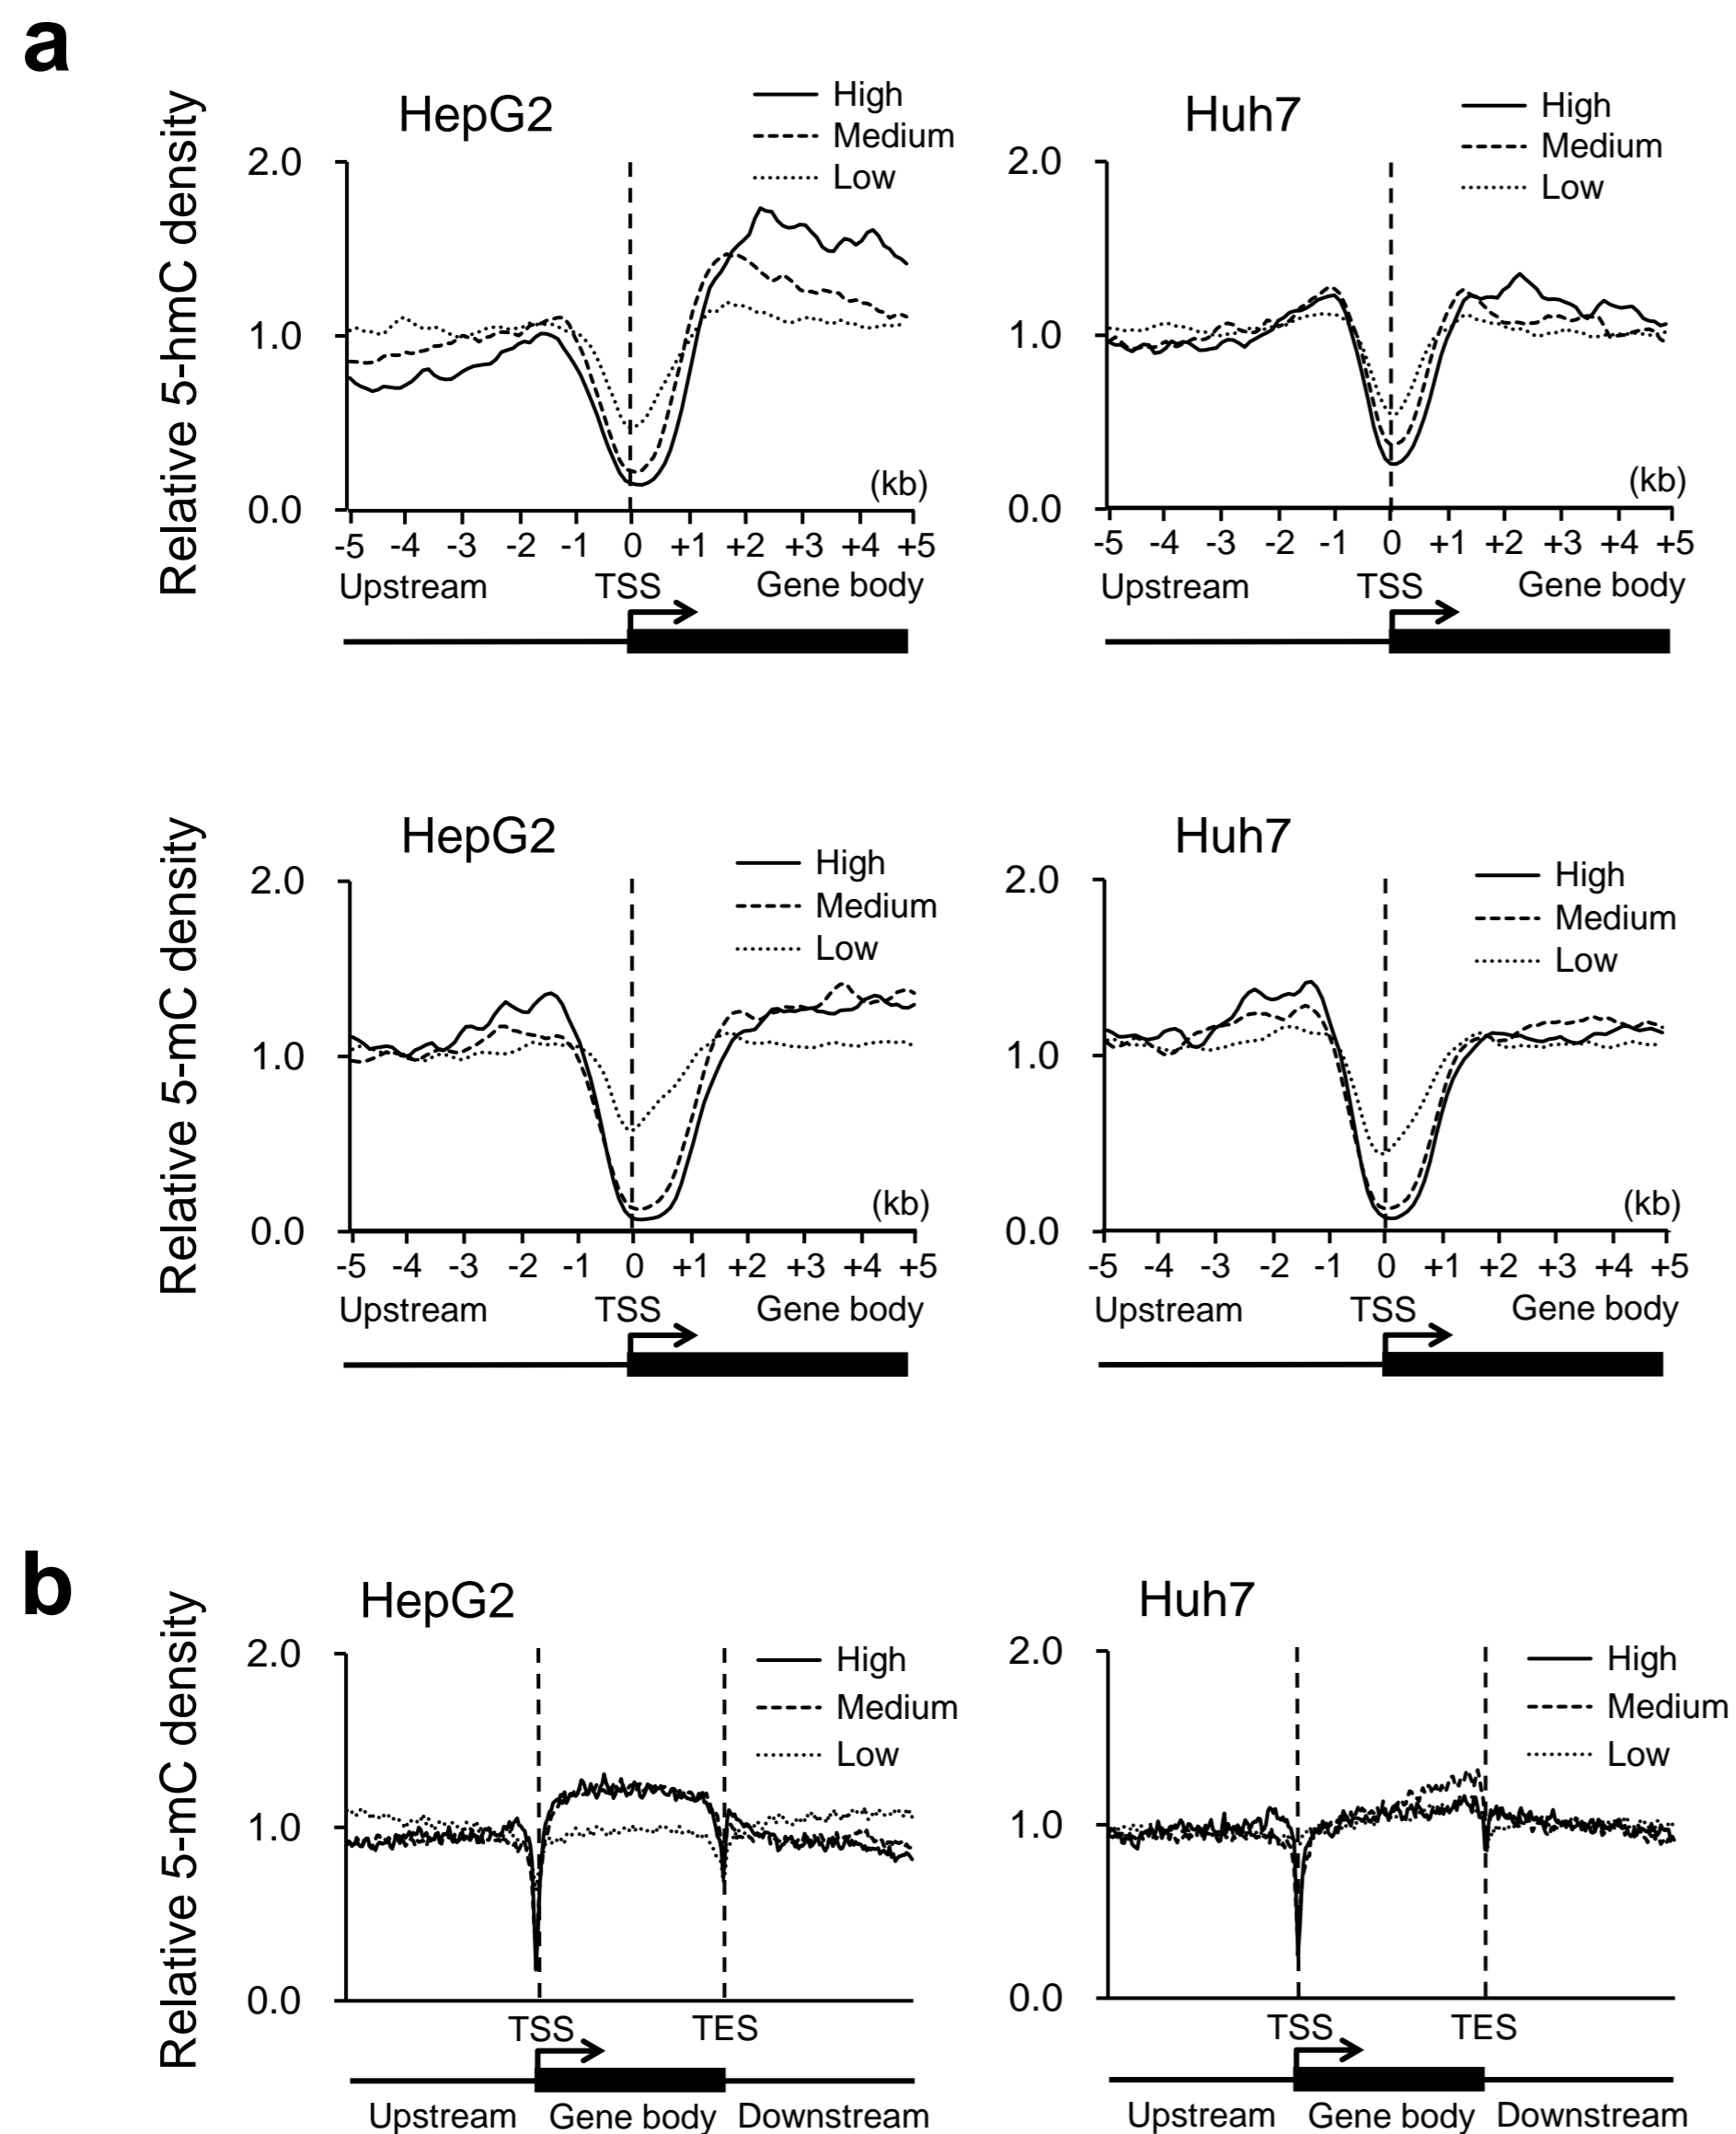

## Figure S5 | 5hmC and 5mC distributions of liver cancer cell lines.

(a) 5hmC and 5mC distributions relative to each gene position around TSS by hmeDIP- (upper) and MeDIP-seq (lower) with regard to the expression levels in HepG2 and Huh7 cells. (b) 5mC distributions relative to human RefSeq gene position by MeDIP-seq according to the expression levels in HepG2 and Huh7. Expression level, High; GeneChip score > 250, Low; GeneChip score < 25, Medium; GeneChip score 25-250

# Figure S6

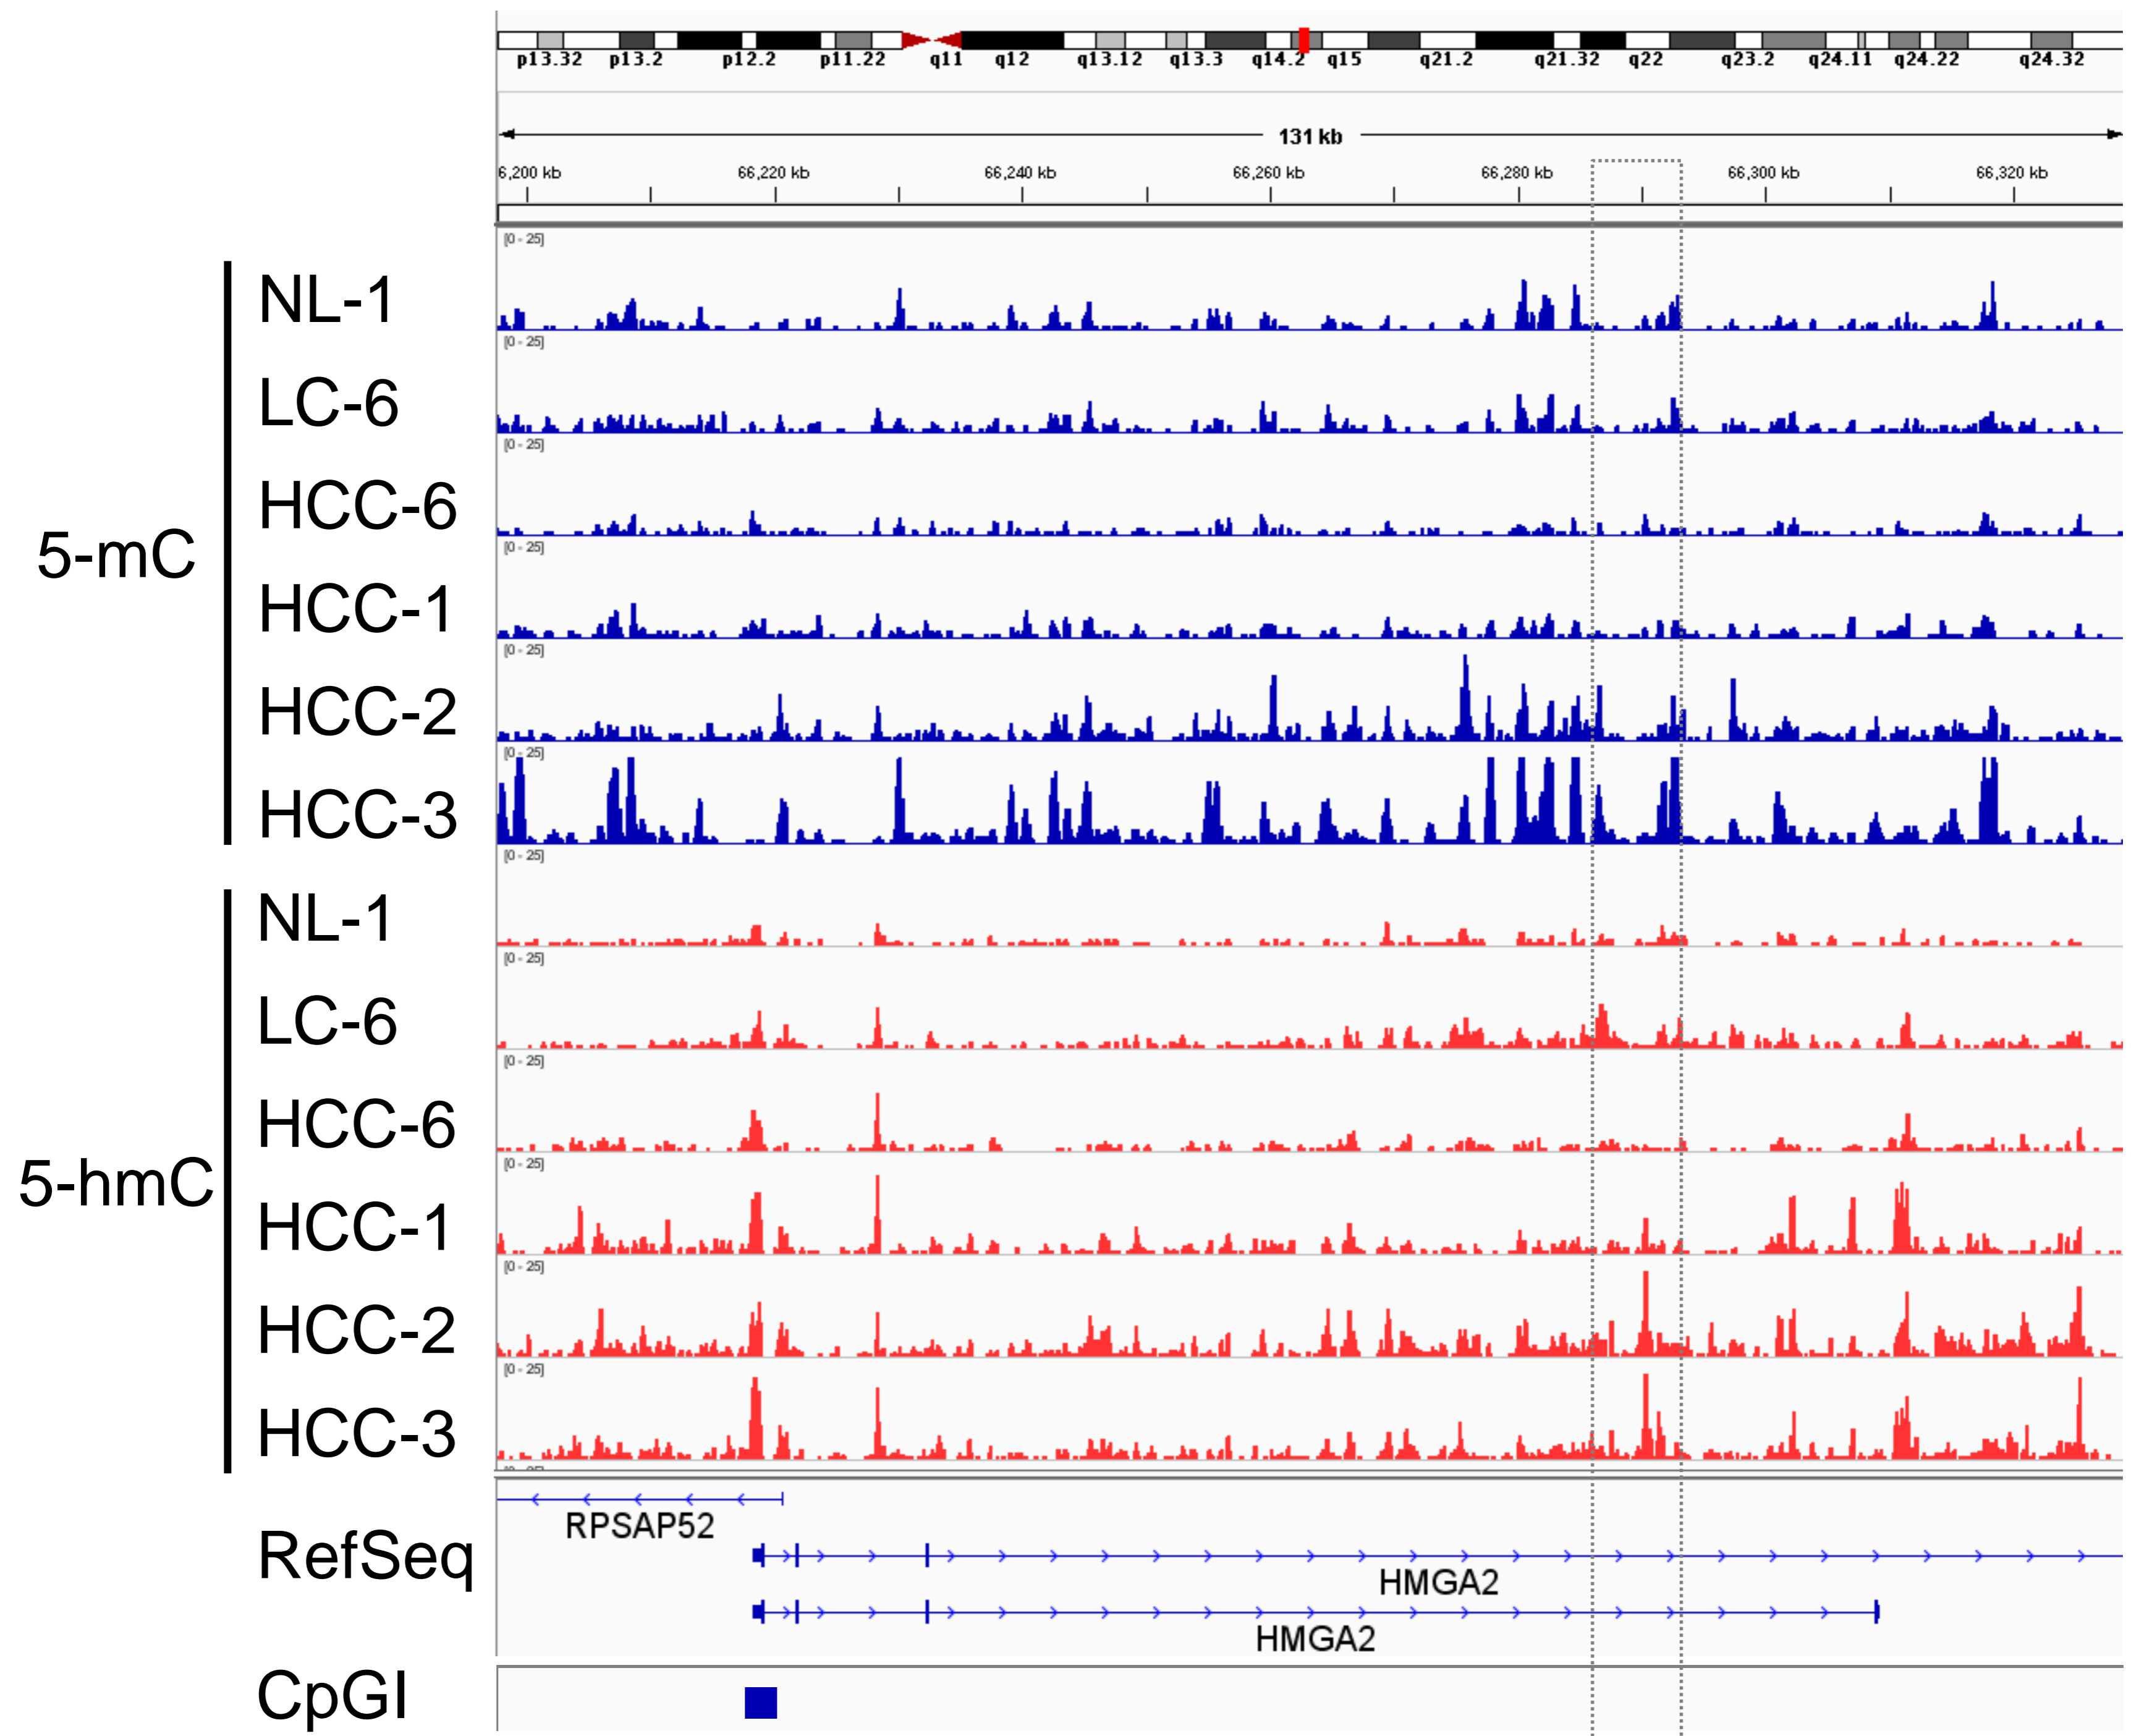

**Figure S6 | 5mC and 5hmC mapping of HMGA2 locus for clinical liver tissues.**

5mC- (blue) and 5hmC- (red) enriched regions of HMGA2 locus are demonstrated using Integrative Genomics Viewer (IGV). The box with dotted lines indicates intragenic enhancer regions identified by CHIP-sequencing analysis of liver cancer cells

# Figure S7

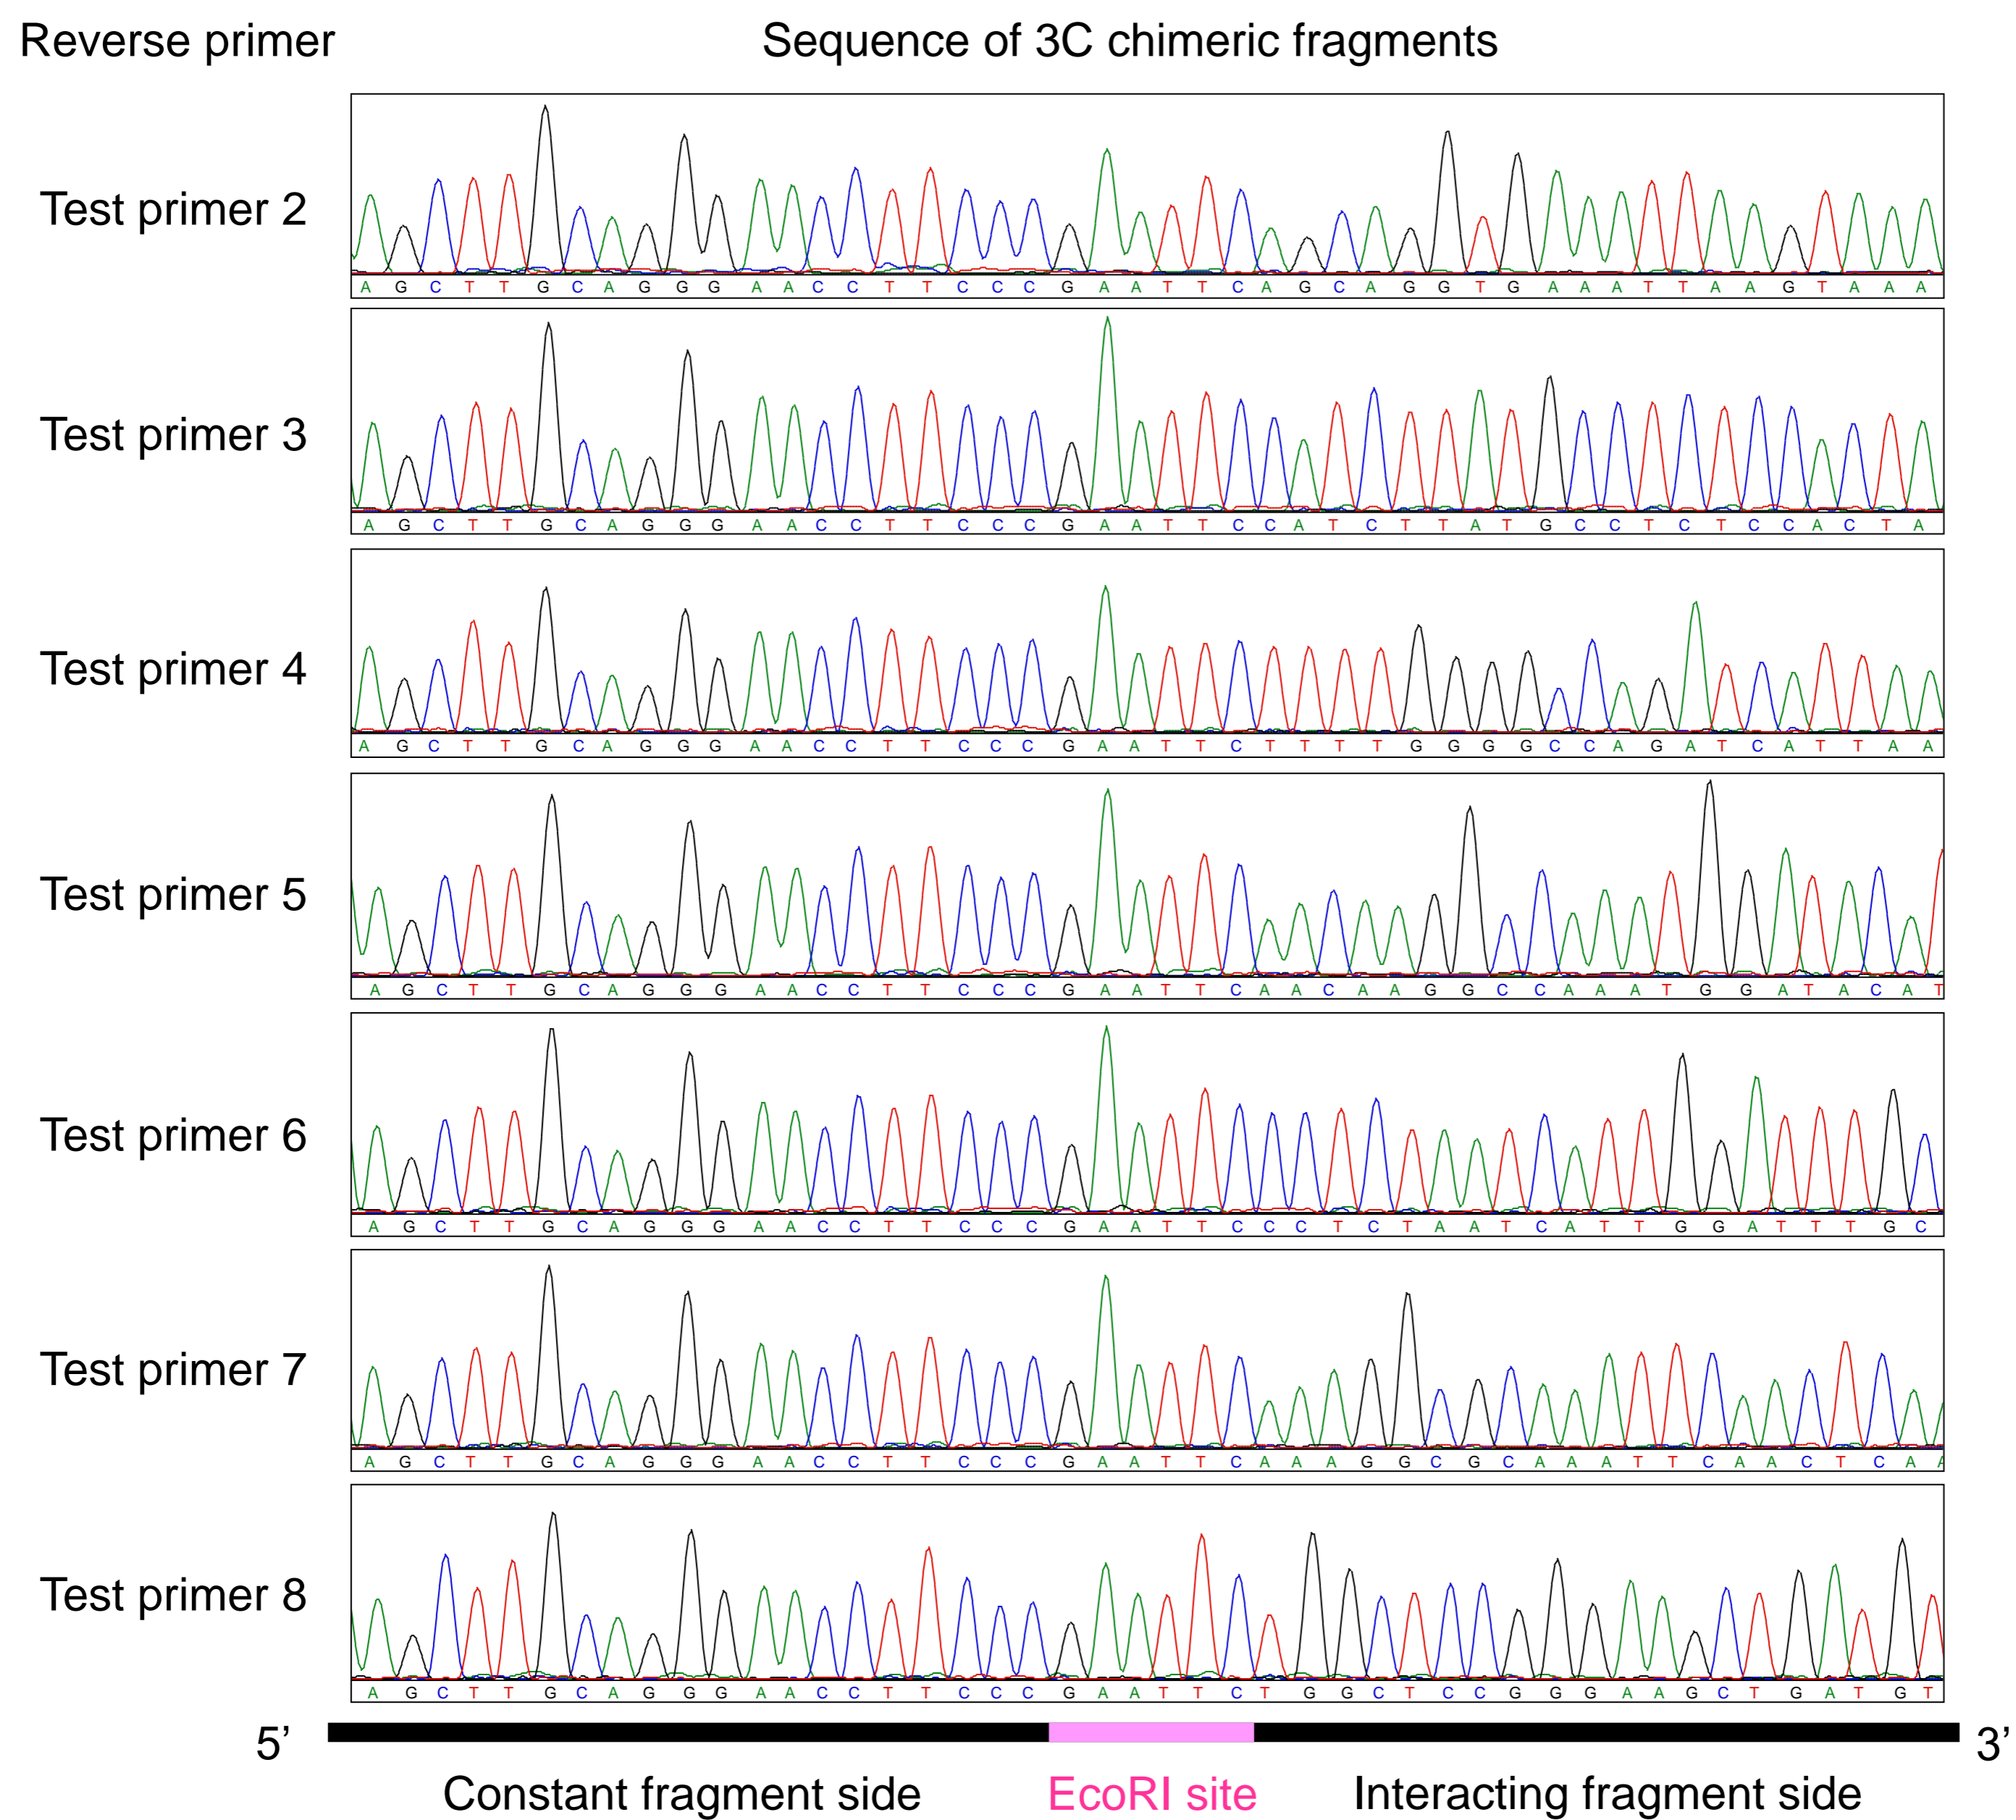

**Figure S7 | Sanger Sequence of 3C chimeric fragments.**

The PCR product is cloned and sequenced with primers that anneal to the vector backbone.

# Figure S8

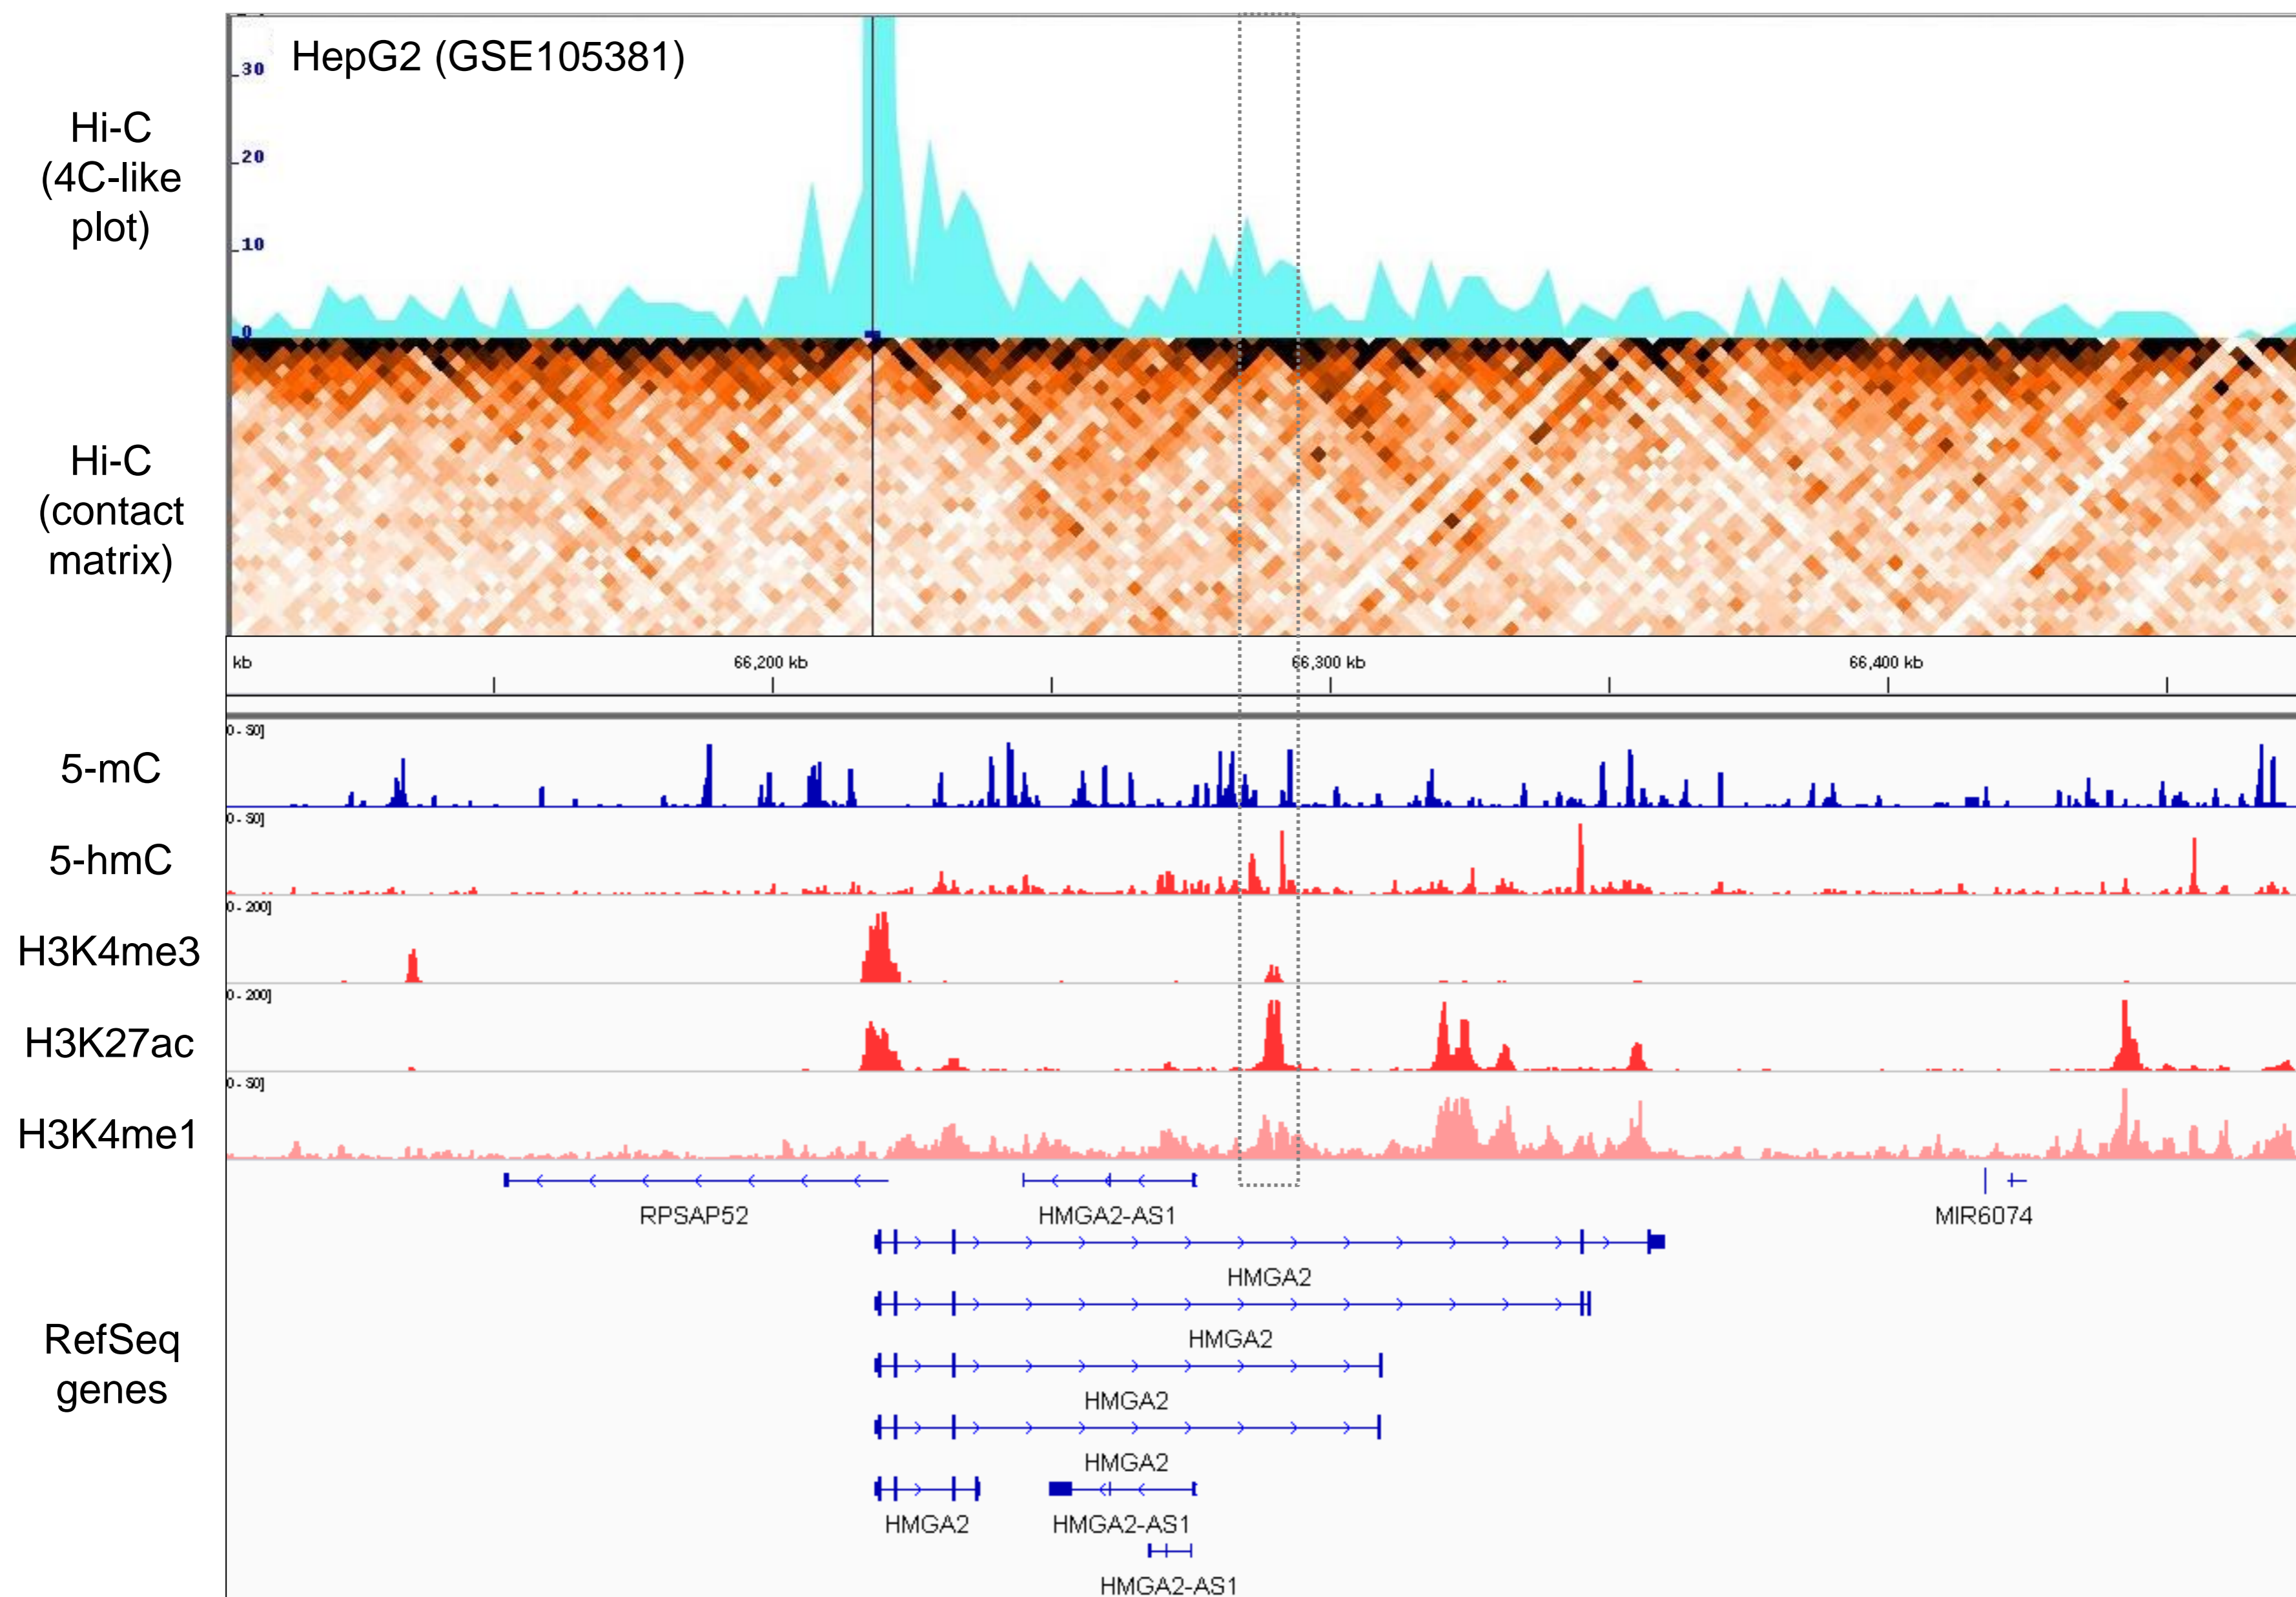

**Figure S8 | 5mC and 5hmC mapping of HMGA2 locus for clinical liver tissues.**

5mC- (blue) and 5hmC- (red) enriched regions of HMGA2 locus are demonstrated using Integrative Genomics Viewer (IGV). The box with dotted lines indicates intragenic enhancer regions identified by ChIP-seq analysis of liver cancer cells



# Figure S9

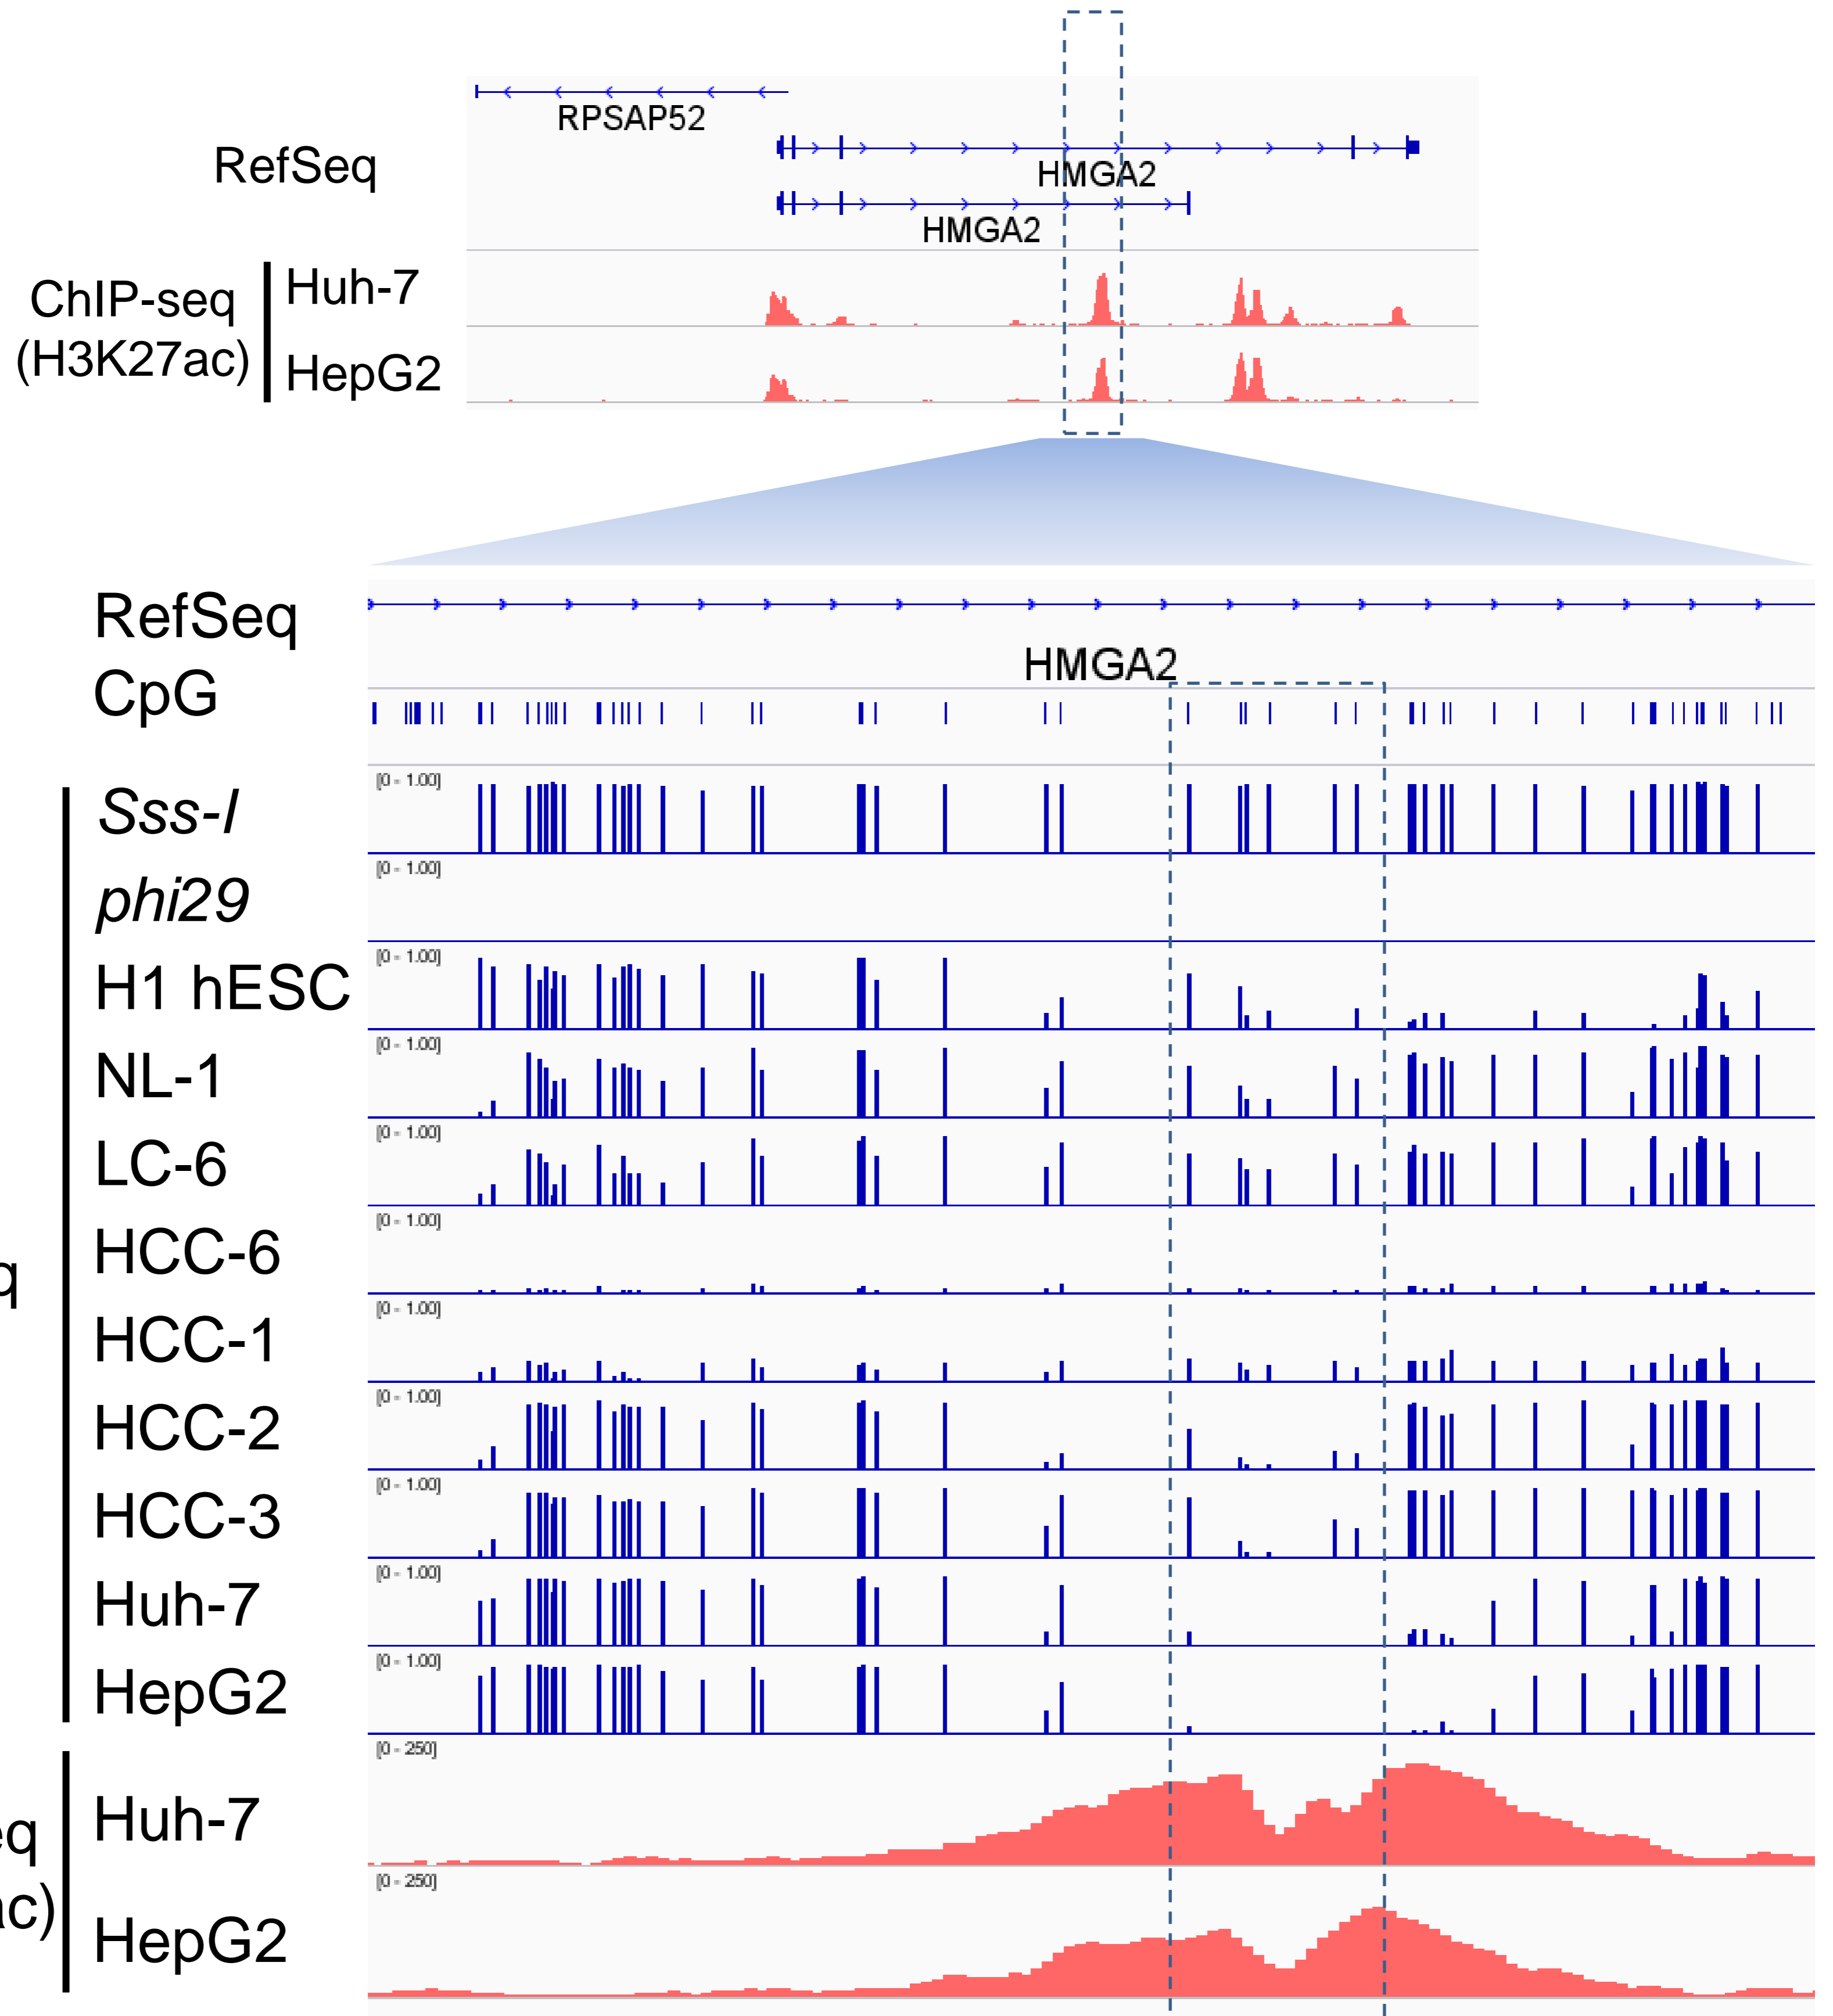

**Figure S9 | 5mC and 5hmC mapping of HMGA2 locus for clinical liver tissues.**

5mC- (blue) and 5hmC- (red) enriched regions of HMGA2 locus are demonstrated using Integrative Genomics Viewer (IGV). The box with dotted lines indicates intragenic enhancer regions identified by ChIP-sequencing analysis of liver cancer cells

# Figure S10

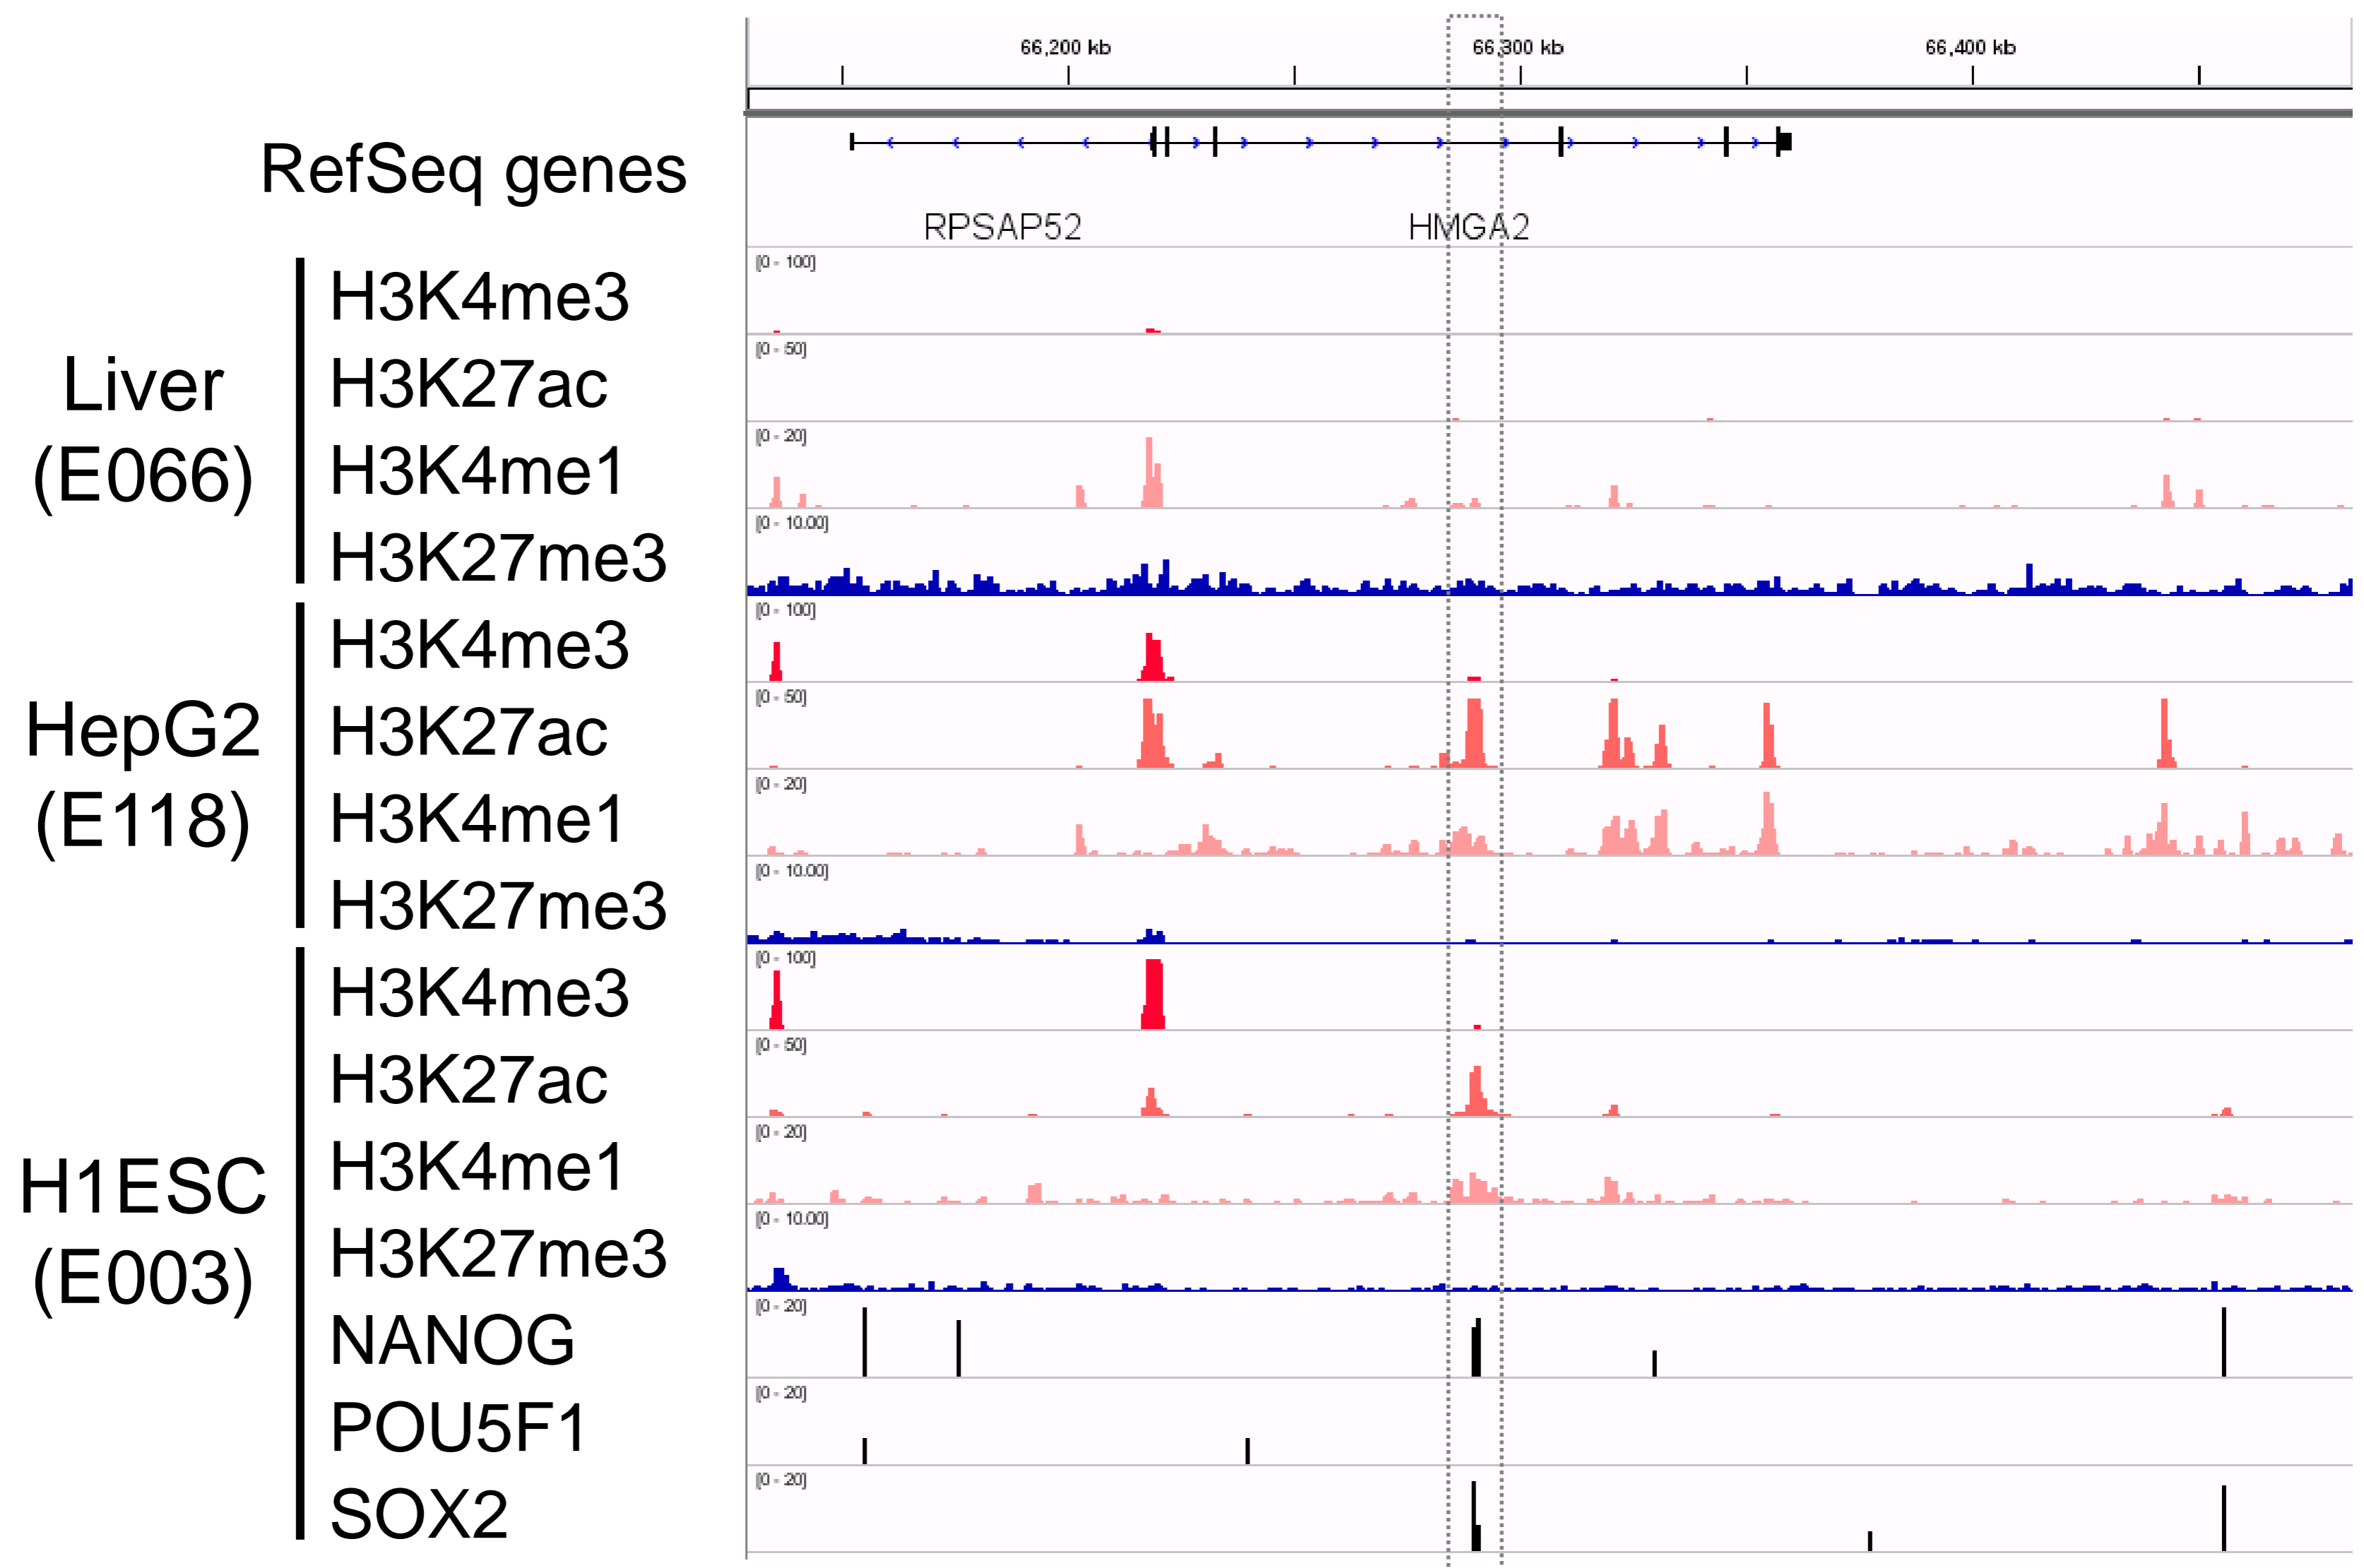

**Figure S10 | Histone modification status 5mC and 5hmC mapping of HMGA2 locus for clinical liver tissues.** 5mC- (blue) and 5hmC- (red) enriched regions of HMGA2 locus are demonstrated using Integrative Genomics Viewer (IGV). The box with dotted lines indicates intragenic enhancer regions identified by ChIP-sequencing analysis of liver cancer cells

# Table S1

| Name               | Sequence                   |
|--------------------|----------------------------|
| si <i>TET1</i> -1  | AAUCAAGCGGAAGAAUAACUCAACA  |
| si <i>TET1</i> -2  | GGCUACACGAUUAGCUCCAAUUUUAU |
| si <i>TET1</i> -3  | GGAAGCACUGUGGUUUUGUACCUUAA |
| si <i>HMGA2</i> -1 | GAACCAACCGGUGAGCCCUCUCCUA  |
| si <i>HMGA2</i> -2 | GGAAACUGAAGAGACAUCCUCACAA  |

**Table S1 | Sense sequence of siRNAs targeting *TET1* and *HMGA2*.**

# Table S2

| Name                 | Sequence                    |
|----------------------|-----------------------------|
| <i>TET1</i> forward  | TGATGACAGAGGTTCTTGACATAAG   |
| <i>TET1</i> reverse  | CAGGTTGCACGGTCTCAGTGTT      |
| <i>HMGA2</i> forward | CCCTGTTCCCTTTGAGTGTCTTCTAAC |
| <i>HMGA2</i> reverse | TTCAACAAGCAAGCGATTCA        |
| <i>ACTB</i> forward  | AGAAGGAGATCACTGCCCTGGCACC   |
| <i>ACTB</i> reverse  | CCTGCTTGCTGATCCACATCTGCTG   |

**Table S2 | Primer sequence for qRT-PCR.**

# Table S3

| Name          | Method     | Pass filtered reads | %PF    | Uniquely mapped reads | %Mapped |
|---------------|------------|---------------------|--------|-----------------------|---------|
| HepG2 H3K4me3 | ChIP-seq   | 32,990,100          | 91.81% | 29,102,178            | 88.21%  |
| Huh7 H3K4me3  | ChIP-seq   | 30,934,362          | 92.29% | 26,583,453            | 85.94%  |
| HepG2 H3K4me1 | ChIP-seq   | 36,466,336          | 93.02% | 30,116,105            | 82.59%  |
| Huh7 H3K4me1  | ChIP-seq   | 34,450,215          | 93.12% | 29,201,716            | 84.76%  |
| HepG2 H3K27ac | ChIP-seq   | 37,973,262          | 91.67% | 33,063,351            | 87.07%  |
| Huh7 H3K27ac  | ChIP-seq   | 34,881,946          | 92.47% | 30,167,015            | 86.48%  |
| HepG2 siCTL   | hmeDIP-seq | 27,656,345          | 80.15% | 15,458,915            | 55.90%  |
| HepG2 siTET1  | hmeDIP-seq | 23,980,711          | 76.72% | 14,563,272            | 60.73%  |
| Huh7 siCTL    | hmeDIP-seq | 26,189,474          | 85.26% | 14,596,475            | 55.73%  |
| Huh7 siTET1   | hmeDIP-seq | 24,907,605          | 85.12% | 13,199,788            | 53.00%  |
| HCC-1         | hmeDIP-seq | 37,810,304          | 67.76% | 25,894,022            | 68.48%  |
| HCC-2         | hmeDIP-seq | 35,767,631          | 77.84% | 22,767,529            | 63.65%  |
| HCC-3         | hmeDIP-seq | 35,882,246          | 75.74% | 24,785,685            | 69.08%  |
| HCC-6         | hmeDIP-seq | 22,626,199          | 82.69% | 14,352,956            | 63.44%  |
| LC-6          | hmeDIP-seq | 24,539,865          | 79.37% | 16,848,046            | 68.66%  |
| NL-1          | hmeDIP-seq | 23,633,662          | 80.51% | 14,220,659            | 60.17%  |
| HepG2 siCTL   | MeDIP-seq  | 36,090,315          | 76.35% | 14,836,630            | 41.11%  |
| HepG2 siTET1  | MeDIP-seq  | 36,717,093          | 78.68% | 15,832,332            | 43.12%  |
| Huh7 siCTL    | MeDIP-seq  | 34,350,531          | 77.03% | 19,973,064            | 58.14%  |
| Huh7 siTET1   | MeDIP-seq  | 30,282,870          | 71.81% | 18,790,623            | 62.05%  |
| HCC-1         | MeDIP-seq  | 23,021,818          | 62.42% | 15,331,339            | 66.59%  |
| HCC-2         | MeDIP-seq  | 24,757,221          | 77.47% | 16,987,547            | 68.62%  |
| HCC-3         | MeDIP-seq  | 27,363,962          | 79.30% | 16,750,731            | 61.21%  |
| HCC-6         | MeDIP-seq  | 31,374,006          | 64.62% | 20,666,264            | 65.87%  |
| LC-6          | MeDIP-seq  | 32,867,789          | 68.19% | 17,932,016            | 54.56%  |
| NL-1          | MeDIP-seq  | 35,991,252          | 65.15% | 14,859,379            | 41.29%  |

**Table S3 | Lists of ChIP-seq, hmeDIP-seq, and MeDIP-seq performed in this study.**

# Table S4

| Name                | Strand | Sequence                       |
|---------------------|--------|--------------------------------|
| HMGA2_enh1 forward  | top    | TAGGGAAAATATTGAATTTGGTTTG      |
| HMGA2_enh1 reverse  | top    | ACACAAAATAACTCTTTCACCAAAAATACT |
| HMGA2_enh2 forward  | top    | TTTGGTGAAAGAGTTATTTGTGTTG      |
| HMGA2_enh2 reverse  | top    | TTATACTTAAAATCAACCCCTTCC       |
| HMGA2_enh3 forward  | top    | GGAAGGGGGTTGATTTTAAGTATAA      |
| HMGA2_enh3 reverse  | top    | CATACAAAACCTTATCTCCCCTTC       |
| HMGA2_enh4 forward  | top    | TATGAAGGAGGGTGAAATTATAG        |
| HMGA2_enh4 reverse  | top    | CTATTCTACATCCATTTACAAATACT     |
| HMGA2_enh5 forward  | top    | TATTAGTATTTGTAAATGGATGTAGA     |
| HMGA2_enh5 reverse  | top    | TAAAACCTCATTTTAACCTCTTTACCA    |
| HMGA2_enh6 forward  | top    | GGTTTTGAATGTATAGTTTTGATTA      |
| HMGA2_enh6 reverse  | top    | CTTAAATTTAACCATATAAAAATAATCC   |
| HMGA2_enh7 forward  | top    | GTAAAGTTGGTTATAAATAGTGATG      |
| HMGA2_enh7 reverse  | top    | CTATTCACTAACATTTTTCAAAACT      |
| HMGA2_enh8 forward  | top    | AAATTTTTTGAGAAAAATGAGAAATTTAGA |
| HMGA2_enh8 reverse  | top    | ACTAAAACCCCTAACTAACATATAACA    |
| HMGA2_enh8 forward  | top    | GTATGTATATTTGGATAATGGTG        |
| HMGA2_enh8 reverse  | top    | TCCTTTATCCTACTAAATTTCTTA       |
| HMGA2_enh9 forward  | top    | TGAAAAGGAATGTTTTAAGGAGG        |
| HMGA2_enh9 reverse  | top    | AATCCCTCTAATAATATTACCCAA       |
| HMGA2_enh10 forward | bottom | TAACATTACCAAAAAAATCAC          |
| HMGA2_enh10 reverse | bottom | TAGAAGATTTGTTTTTAGAAATGG       |
| HMGA2_enh11 forward | top    | AGAAGTAGATTTTTTGATTTTTG        |
| HMGA2_enh11 reverse | top    | CCAAACTCATTCTCACTCAACTAC       |
| HMGA2_enh12 forward | top    | TTGGTTGTGTTATTAATGTTAGATTG     |
| HMGA2_enh12 reverse | top    | TAAAATAATAAATACCTCATTTACCC     |
| HMGA2_enh13 forward | top    | TATTGATTATAGTTATTTTGTGG        |
| HMGA2_enh13 reverse | top    | ATCCTCCCTTAACCTAACATTCC        |
| HMGA2_enh14 forward | top    | GAGGATGGGTGAAAAGTAATG          |
| HMGA2_enh14 reverse | top    | TAAAATTTTACTCTTATCATCCAAAC     |
| HMGA2_enh15 forward | top    | GTATTTTAGTTTGGATGATAAGAG       |
| HMGA2_enh15 reverse | top    | AATAAAAATTTAAAAACTATTAACAAC    |

**Table S4 | Primer sequence for 3C-qPCR.**

# Table S5

| Name            | Site | Sequence                   |
|-----------------|------|----------------------------|
| Constant primer | (1)  | GTCTCCGATGTGTTTGCTCTC      |
| Test primer 2   | 2    | ATGTGCTGGTGCATTAAGTAAG     |
| Test primer 3   | 3    | TGGGCCTGGGTGATAGTG         |
| Test primer 4   | 4    | CATTCTGTAAAGCTAATTGCACAAC  |
| Test primer 5   | 5    | GTGGTTTGTTCCTTTTCGCATGTATC |
| Test primer 6   | 6    | AGCTTTGTGATCCCTCTGGTAATG   |
| Test primer 7   | 7    | GTGCTGAAAGGATAAAGGTGAATAG  |
| Test primer 8   | 8    | TGGCTCACTTCATCCACAACCTA    |
| TaqMan probe    |      | ACTGGTGCTAGTGGTCCCAC       |

**Table S5 | Primer sequence for multiplex targeted sequence of BS-treated amplicons.**
